# Supplementary material for: Transcriptional and metabolic responses of apple to different potassium environments
Source: Front Plant Sci. 2023 Mar 10;14:1131708. doi: 10.3389/fpls.2023.1131708 (PMC10036783; doi:10.3389/fpls.2023.1131708)
Supplement: Supplementary file 2 [file DataSheet_2.xlsx]

## Sheet: Sheet2
Table S4. Differential metabolites among different potassium treatments in apple leaves and roots.
LKL/CKL											HKL/CKL											LKR/CKR											HKR/CKR
Index	Formula	Compounds	Class I	Class II	CAS	VIP	Fold_Change	Log2FC	Type		Index	Formula	Compounds	Class I	Class II	CAS	VIP	Fold_Change	Log2FC	Type		Index	Formula	Compounds	Class I	Class II	CAS	VIP	Fold_Change	Log2FC	Type		Index	Formula	Compounds	Class I	Class II	CAS	VIP	Fold_Change	Log2FC	Type
Hmbp001276	C8H8O4	Gallacetophenone	Phenolic acids	Phenolic acids	528-21-2	1.23415	2.10152	1.07143	up		Lmyp004052	C30H26O14	Quercetin-3-O-(6''-O-p-Coumaroyl)galactoside	Flavonoids	Flavonols	-	1.25359	0.379243	-1.3988	down		Lmhp008885	C20H42NO7P	LysoPE 15:0(2n isomer)	Lipids	LPE	-	1.32399	0.473437	-1.07875	down		Lmyp004052	C30H26O14	Quercetin-3-O-(6''-O-p-Coumaroyl)galactoside	Flavonoids	Flavonols	-	1.39076	0.000553267	-10.8197	down
Lmyp004052	C30H26O14	Quercetin-3-O-(6''-O-p-Coumaroyl)galactoside	Flavonoids	Flavonols	-	1.25057	0.490538	-1.02756	down		pme0490	C6H5NO2	Nicotinic acid (Vitamin B3)	Others	Vitamin	59-67-6	1.25371	2.17353	1.12004	up		mws0396	C18H34O2	Elaidic Acid	Lipids	Free fatty acids	112-79-8	1.32855	0.441511	-1.17948	down		pmp000441	C30H46O4	3-Hydroxy-11-oxours-12-en-28-oic acid (11-Keto-ursolic acid)	Terpenoids	Triterpene	105870-59-5	1.35735	2.21679	1.14847	up
pmp000441	C30H46O4	3-Hydroxy-11-oxours-12-en-28-oic acid (11-Keto-ursolic acid)	Terpenoids	Triterpene	105870-59-5	1.25195	0.426676	-1.22879	down		Hmhn000927	C12H16O8	Phloroglucinol-1-O-β-D-glucopyranoside	Phenolic acids	Phenolic acids	-	1.24377	0.412854	-1.2763	down		Lskp211455	C30H48O4	2,3-Dihydroxyurs-12-en-29-oic acid (Maslinic acid)	Terpenoids	Triterpene	4373-41-5	1.14166	2.11659	1.08174	up		Wafn015217	C20H40O3	Hydroxyicosanoic Acid	Lipids	Free fatty acids	-	1.39084	1271.99	10.3129	up
Lhdp102528	C30H46O4	3-Oxo-19-hydroxyurs-12-en-28-oic acid (Pomonic acid)	Terpenoids	Triterpene	13849-90-6	1.2526	0.38767	-1.3671	down		pmb2795	C10H10O3	4-Methoxycinnamic acid	Phenolic acids	Phenolic acids	830-09-1	1.21441	2.05389	1.03836	up		Lmcn009122	C16H30O2	(7Z)-Hexadecenoic acid	Lipids	Free fatty acids	2416-19-5	1.28035	0.470322	-1.08828	down		pmp000021	C16H14O5	Isooxypeucedanine	Lignans and Coumarins	Coumarins	5058-15-1	1.3848	0.41497	-1.26892	down
Lskp211455	C30H48O4	2,3-Dihydroxyurs-12-en-29-oic acid (Maslinic acid)	Terpenoids	Triterpene	4373-41-5	1.1258	0.477891	-1.06525	down		pme0008	C6H13N3O3	L-Citrulline	Amino acids and derivatives	Amino acids and derivatives	372-75-8	1.25554	2.90945	1.54075	up		Ymjm000099	C30H44O3	3-Oxooleana-11,13(18)-dien-28-oic acid	Terpenoids	Triterpene	-	1.37235	2.68336	1.42404	up		MWSslk233	C16H14O5	Oxypeucedanin	Lignans and Coumarins	Coumarins	737-52-0	1.3848	0.41497	-1.26892	down
pme0490	C6H5NO2	Nicotinic acid (Vitamin B3)	Others	Vitamin	59-67-6	1.25329	2.05701	1.04055	up		Lmyp004617	C21H22O9	Pinocembrin-7-O-glucoside (Pinocembroside)	Flavonoids	Flavanones	75829-43-5	1.2564	0.233044	-2.10132	down		mws0014	C10H10O4	Ferulic acid	Phenolic acids	Phenolic acids	537-98-4	1.34587	2.08103	1.0573	up		Smpp009685	C39H54O8	3-O-Cafeoyltormentic acid	Terpenoids	Triterpene	-	1.37015	0.380564	-1.39379	down
Hmhn000927	C12H16O8	Phloroglucinol-1-O-β-D-glucopyranoside	Phenolic acids	Phenolic acids	-	1.24868	0.410913	-1.2831	down		mws0178	C16H18O9	Chlorogenic acid (3-O-Caffeoylquinic acid)	Phenolic acids	Phenolic acids	327-97-9	1.24997	0.365537	-1.45191	down		pme0422	C10H10O4	Isoferulic Acid	Phenolic acids	Phenolic acids	25522-33-2	1.34587	2.08103	1.0573	up		Ymjm000099	C30H44O3	3-Oxooleana-11,13(18)-dien-28-oic acid	Terpenoids	Triterpene	-	1.3898	4.14755	2.05226	up
mws0178	C16H18O9	Chlorogenic acid (3-O-Caffeoylquinic acid)	Phenolic acids	Phenolic acids	327-97-9	1.25397	0.347805	-1.52365	down		pmp001310	C27H30O17	6-Hydroxykaempferol-3,6-O-Diglucoside	Flavonoids	Flavonols	-	1.25577	0.134561	-2.89367	down		Smpn009074	C30H48O6	2,3,19,23-Tetrahydroxyurs-12-en-28-oic acid	Terpenoids	Triterpene	-	1.35843	0.381207	-1.39135	down		Lmsp003655	C26H32O11	Dehydrodiconiferyl alcohol-gamma'-O-glucoside	Phenolic acids	Phenolic acids	-	1.38553	2.55899	1.35557	up
pmp001310	C27H30O17	6-Hydroxykaempferol-3,6-O-Diglucoside	Flavonoids	Flavonols	-	1.25874	0.176356	-2.50344	down		pmb0998	C10H14N5O8P	Guanosine 5'-monophosphate	Nucleotides and derivatives	Nucleotides and derivatives	85-32-5	1.25381	3.42399	1.77568	up		Lmhp008763	C21H42NO7P	LysoPE 16:1(2n isomer)	Lipids	LPE	-	1.36814	0.439649	-1.18558	down		Cmsp003083	C26H32O11	Dehydrodiconiferyl alcohol-4-O-glucoside	Lignans and Coumarins	Lignans	107870-88-2	1.3544	2.34303	1.22838	up
pmb0998	C10H14N5O8P	Guanosine 5'-monophosphate	Nucleotides and derivatives	Nucleotides and derivatives	85-32-5	1.2355	2.17654	1.12204	up		Lhzp102808	C20H18O6	Sesamin	Lignans and Coumarins	Lignans	607-80-7	1.25558	0.464483	-1.1063	down		Lmdp004267	C30H26O14	Quercetin-3-O-(6''-O-p-Coumaroyl)glucoside	Flavonoids	Flavonols	-	1.37737	1552.02	10.5999	up		mws0014	C10H10O4	Ferulic acid	Phenolic acids	Phenolic acids	537-98-4	1.38676	2.20454	1.14048	up
Lhzp102808	C20H18O6	Sesamin	Lignans and Coumarins	Lignans	607-80-7	1.25572	0.372318	-1.42539	down		Lskp211486	C30H46O5	2,19-Dihydroxy-3-oxo-24-norolean-12-en-28-oic acid	Terpenoids	Triterpene	-	1.24916	0.34715	-1.52637	down		MWSmce119	C6H14N4O2	L-Arginine	Amino acids and derivatives	Amino acids and derivatives	74-79-3	1.37792	2.64921	1.40556	up		pme0422	C10H10O4	Isoferulic Acid	Phenolic acids	Phenolic acids	25522-33-2	1.38676	2.20454	1.14048	up
Lskp211486	C30H46O5	2,19-Dihydroxy-3-oxo-24-norolean-12-en-28-oic acid	Terpenoids	Triterpene	-	1.24555	0.386377	-1.37192	down		Lmln001195	C14H18O7	Picein (4-Acetylphenyl-glucoside)	Phenolic acids	Phenolic acids	530-14-3	1.24407	0.306549	-1.70581	down		mad2085	C22H18O11	Caffeoyl-p-coumaroyltartaric acid	Phenolic acids	Phenolic acids	-	1.37718	1087.55	10.0869	up		Lmhp008718	C25H48NO7P	LysoPC 17:2	Lipids	LPC	-	1.38131	2.16046	1.11134	up
Lmln001195	C14H18O7	Picein (4-Acetylphenyl-glucoside)	Phenolic acids	Phenolic acids	530-14-3	1.25583	0.285522	-1.80832	down		MWSmce675	C12H16O7	Arbutin	Phenolic acids	Phenolic acids	497-76-7	1.24595	0.42598	-1.23114	down		MWS20966	C7H15N3O2S	S-methyl-L-thiocitrulline	Amino acids and derivatives	Amino acids and derivatives	209589-59-3	1.37829	46937.7	15.5185	up		MWSmce119	C6H14N4O2	L-Arginine	Amino acids and derivatives	Amino acids and derivatives	74-79-3	1.3904	2.88665	1.5294	up
MWSmce675	C12H16O7	Arbutin	Phenolic acids	Phenolic acids	497-76-7	1.25163	0.453713	-1.14015	down		pme0021	C9H11NO2	L-Phenylalanine	Amino acids and derivatives	Amino acids and derivatives	63-91-2	1.25577	0.233932	-2.09584	down		Lmdp004892	C24H22O14	Kaempferol-3-O-(6''-malonyl)galactoside	Flavonoids	Flavonols	-	1.33848	2.408	1.26783	up		mad2085	C22H18O11	Caffeoyl-p-coumaroyltartaric acid	Phenolic acids	Phenolic acids	-	1.38831	1370.83	10.4208	up
pme1109	C5H5N5O	Guanine	Nucleotides and derivatives	Nucleotides and derivatives	73-40-5	1.25362	0.410946	-1.28298	down		Ymjm000099	C30H44O3	3-Oxooleana-11,13(18)-dien-28-oic acid	Terpenoids	Triterpene	-	1.25399	0.259009	-1.94893	down		pmb3081	C6H11PO11	Glucarate O-Phosphoric acid	Others	Saccharides	-	1.31985	2.07834	1.05543	up		pmp001311	C27H30O17	6-Hydroxykaempferol-7,6-O-Diglucoside	Flavonoids	Flavonols	-	1.32414	2.01809	1.01299	up
Lhwp110301	C30H46O4	19-Hydroxy-2-(hydroxymethyl)-A(1)-norursa-2,12-dien-28-oic acid (Coleonolic acid)	Terpenoids	Triterpene	-	1.25009	0.386539	-1.37131	down		pme1137	C6H5NO3	6-Hydroxynicotinic acid	Alkaloids	Pyridine alkaloids	5006-66-6	1.25334	0.000104929	-13.2183	down		pme2735	C15H22N6O5S	S-(5'-Adenosyl)-L-methionine	Amino acids and derivatives	Amino acids and derivatives	29908-03-0	1.35996	2.09453	1.06663	up		MWS20966	C7H15N3O2S	S-methyl-L-thiocitrulline	Amino acids and derivatives	Amino acids and derivatives	209589-59-3	1.39081	44126.9	15.4294	up
pme0021	C9H11NO2	L-Phenylalanine	Amino acids and derivatives	Amino acids and derivatives	63-91-2	1.25596	0.331461	-1.59309	down		Lmlp005236	C21H22O11	Dihydrokaempferol-3-O-glucoside	Flavonoids	Flavanonols	1049-08-8	1.25091	0.470208	-1.08863	down		Lmhp009769	C22H44NO7P	LysoPE 17:1	Lipids	LPE	-	1.37828	1.18119e-06	-19.6913	down		Lmsn000954	C8H16O6	Dambonitol	Others	Saccharides	523-94-4	1.38384	0.000231101	-12.0792	down
Ymjm000099	C30H44O3	3-Oxooleana-11,13(18)-dien-28-oic acid	Terpenoids	Triterpene	-	1.25788	0.21255	-2.23413	down		MWS04559g	C9H11NO3	3-Hydroxy-L-phenylalanine	Amino acids and derivatives	Amino acids and derivatives	587-33-7	1.25271	0.401201	-1.3176	down		Zmcp002666	C27H30O17	Quercetin-3,7-Di-O-glucoside	Flavonoids	Flavonols	-	1.34978	0.000451715	-11.1123	down		Lmhp009769	C22H44NO7P	LysoPE 17:1	Lipids	LPE	-	1.38334	2.41907	1.27445	up
Lmlp005236	C21H22O11	Dihydrokaempferol-3-O-glucoside	Flavonoids	Flavanonols	1049-08-8	1.25617	0.446446	-1.16344	down		Lmyn001269	C27H30O16	Kaempferol-3-O-sophoroside	Flavonoids	Flavonols	19895-95-5	1.21373	5.05973	2.33906	up		pmb0325	C17H27N3O3	Feruloylspermidine	Alkaloids	Phenolamine	-	1.37809	74518.7	16.1853	up		pmb0325	C17H27N3O3	Feruloylspermidine	Alkaloids	Phenolamine	-	1.39089	106137	16.6956	up
MWS04559g	C9H11NO3	3-Hydroxy-L-phenylalanine	Amino acids and derivatives	Amino acids and derivatives	587-33-7	1.25698	0.403845	-1.30813	down		Lmsp003655	C26H32O11	Dehydrodiconiferyl alcohol-gamma'-O-glucoside	Phenolic acids	Phenolic acids	-	1.2559	0.485216	-1.0433	down		mws0362	C17H34O2	Heptadecanoic acid	Lipids	Free fatty acids	506-12-7	1.15839	0.203379	-2.29776	down		Lmhp008742	C28H48NO7P	LysoPC 20:5	Lipids	LPC	162440-04-2	1.38856	5.50729	2.46134	up
Lmyn001269	C27H30O16	Kaempferol-3-O-sophoroside	Flavonoids	Flavonols	19895-95-5	1.23602	9.8903	3.30601	up		Zmbp002538	C11H12N2O2	1-Methoxy-indole-3-acetamide	Alkaloids	Plumerane	-	1.25572	0.16585	-2.59205	down		MWS0442	C18H32O16	Maltotriose	Others	Saccharides	1109-28-0	1.28388	2.55891	1.35553	up		pme2993	C10H8O4	Scopoletin (7-Hydroxy-6-methoxycoumarin)	Lignans and Coumarins	Coumarins	92-61-5	1.28315	2.89331	1.53272	up
Zmbp002538	C11H12N2O2	1-Methoxy-indole-3-acetamide	Alkaloids	Plumerane	-	1.25024	0.197741	-2.33832	down		pme1598	C22H24O11	Hesperetin-5-O-glucoside	Flavonoids	Flavanones	69651-80-5	1.21891	0.480191	-1.05832	down		Lmyn012331	C18H34O2	Petroselinic acid	Lipids	Free fatty acids	593-39-5	1.32283	0.45107	-1.14858	down		mws0567	C5H11N3O2	4-Guanidinobutyric acid	Organic acids	Organic acids	463-00-3	1.3787	2.73377	1.45089	up
Lmyn002403	C14H18O8	Mandelic acid-β-glucoside	Phenolic acids	Phenolic acids	-	1.24989	0.458789	-1.1241	down		pme1216	C6H5NO2	2-Picolinic acid	Organic acids	Organic acids	98-98-6	1.2454	2.62127	1.39026	up		pmb0964	C16H23N5O5	Isopentenyladenine-7-N-glucoside	Nucleotides and derivatives	Nucleotides and derivatives	-	1.32566	3.13745	1.64959	up		pme0026	C6H14N2O2	L-Lysine	Amino acids and derivatives	Amino acids and derivatives	56-87-1	1.37417	2.04308	1.03075	up
pme1216	C6H5NO2	2-Picolinic acid	Organic acids	Organic acids	98-98-6	1.24662	2.13271	1.09269	up		mws4516	C5H7NO3	Pyroglutamic acid	Amino acids and derivatives	Amino acids and derivatives	4042-36-8	1.25106	2.4883	1.31516	up		mws5037	C9H18N2O3	L-Alanyl-L-leucine	Amino acids and derivatives	Amino acids and derivatives	3303-34-2	1.12892	2.20168	1.1386	up		Lmhp009464	C22H44NO7P	LysoPE 17:1(2n isomer)	Lipids	LPE	-	1.38337	2.39815	1.26192	up
Lskp211249	C22H26O6	epieudesmin	Lignans and Coumarins	Lignans	-	1.2319	0.48766	-1.03605	down		Lskp211249	C22H26O6	epieudesmin	Lignans and Coumarins	Lignans	-	1.23538	0.36168	-1.46721	down		mws0914	C15H12O5	3,5,7-Trihydroxyflavanone (Pinobanksin)	Flavonoids	Flavanonols	548-82-3	1.3744	3.8527	1.94587	up		pmb2620	C11H12O4	3,4-Dimethoxycinnamic acid	Phenolic acids	Phenolic acids	2316-26-9	1.39037	2.32403	1.21663	up
pmb0069	C7H7NO	Benzamide	Phenolic acids	Phenolic acids	55-21-0	1.23911	6.72119	2.74872	up		pmb0069	C7H7NO	Benzamide	Phenolic acids	Phenolic acids	55-21-0	1.18023	2.65878	1.41076	up		pme0026	C6H14N2O2	L-Lysine	Amino acids and derivatives	Amino acids and derivatives	56-87-1	1.36922	2.22434	1.15338	up		Lmyn011818	C30H44O4	3,19-Epoxy-3,22-dihydroxydammara-20,24-dien-26-oic acid δ-lactone (Semialactone)	Terpenoids	Triterpene	366450-46-6	1.37608	0.38148	-1.39032	down
mws0066	C16H12O7	Isorhamnetin; 3'-Methoxy-3,4',5,7-Tetrahydroxyflavone	Flavonoids	Flavonols	480-19-3	1.24709	3.91603	1.96939	up		mws0066	C16H12O7	Isorhamnetin; 3'-Methoxy-3,4',5,7-Tetrahydroxyflavone	Flavonoids	Flavonols	480-19-3	1.2453	4.06276	2.02246	up		Lmhp009464	C22H44NO7P	LysoPE 17:1(2n isomer)	Lipids	LPE	-	1.37112	0.314653	-1.66817	down		mws1375	C12H21N3O6	Nicotianamine	Alkaloids	Alkaloids	34441-14-0	1.36741	2.0615	1.0437	up
pmp000268	C30H46O5	2-Hydroxymethyl-A(1)-nor-19,24-dihydroxyurs-2,12-dien-28-oic acid (Rosamultic acid)	Terpenoids	Triterpene	214285-76-4	1.25277	0.397927	-1.32943	down		Cmsp003083	C26H32O11	Dehydrodiconiferyl alcohol-4-O-glucoside	Lignans and Coumarins	Lignans	107870-88-2	1.25203	0.477778	-1.06559	down		mws1164	C6H12O6	D-Fructose	Others	Saccharides	57-48-7	1.3671	2.89582	1.53397	up		MWSmce083	C11H12O4	Ferulic acid methyl ester	Phenolic acids	Phenolic acids	2309-07-1	1.38778	2.22105	1.15124	up
mws0014	C10H10O4	Ferulic acid	Phenolic acids	Phenolic acids	537-98-4	1.21439	4.81591	2.26781	up		pmp000268	C30H46O5	2-Hydroxymethyl-A(1)-nor-19,24-dihydroxyurs-2,12-dien-28-oic acid (Rosamultic acid)	Terpenoids	Triterpene	214285-76-4	1.24105	0.335885	-1.57396	down		pme2253	C6H10O6	L-Gulono-1,4-Lactone	Others	Saccharides	1128-23-0	1.37756	3.41842e-05	-14.8363	down		Lmhp009590	C25H50NO7P	LysoPC 17:1	Lipids	LPC	-	1.35982	2.28467	1.19199	up
pme0422	C10H10O4	Isoferulic Acid	Phenolic acids	Phenolic acids	25522-33-2	1.21439	4.81591	2.26781	up		mws0014	C10H10O4	Ferulic acid	Phenolic acids	Phenolic acids	537-98-4	1.2081	6.65077	2.73352	up		Lmsn009824	C30H48O6	2,3,19,23-Tetrahydroxyolean-12-en-28-oic acid	Terpenoids	Triterpene	55306-03-1	1.37504	0.000990821	-9.97909	down		pme0193	C5H10N2O3	L-Glutamine	Amino acids and derivatives	Amino acids and derivatives	56-85-9	1.37917	2.09476	1.06679	up
pme0033	C5H4N4O	Hypoxanthine	Nucleotides and derivatives	Nucleotides and derivatives	68-94-0	1.16211	2.5128	1.32929	up		pme0422	C10H10O4	Isoferulic Acid	Phenolic acids	Phenolic acids	25522-33-2	1.2081	6.65077	2.73352	up		pmb0885	C18H26O3	4-Oxo-9Z,11Z,13E,15E-Octadecatetraenoic Acid	Lipids	Free fatty acids	-	1.37777	0.00137806	-9.50315	down		Lmbp002309	C17H22O9	Sinapaldehyde-4-O-Glucoside	Phenolic acids	Phenolic acids	154461-65-1	1.37351	2.09283	1.06546	up
Zbdp002392	C8H6O4	Piperonylic acid	Organic acids	Organic acids	94-53-1	1.21381	0.382027	-1.38825	down		pme0033	C5H4N4O	Hypoxanthine	Nucleotides and derivatives	Nucleotides and derivatives	68-94-0	1.21738	2.81236	1.49178	up		Zmgn000173	C5H10O5	D-Ribose	Others	Saccharides	50-69-1	1.32113	2.18655	1.12865	up		Lmmp002080	C11H16N2O	N-(4-Aminobutyl)benzamide	Alkaloids	Alkaloids	5692-23-9	1.36865	0.445394	-1.16684	down
Lmsn011830	C30H46O5	2,19-Dihydroxy-3-oxours-12-en-28-oic acid	Terpenoids	Triterpene	176983-21-4	1.25786	0.403196	-1.31045	down		Zbdp002392	C8H6O4	Piperonylic acid	Organic acids	Organic acids	94-53-1	1.22105	0.336788	-1.57009	down		pme2960	C15H12O5	Naringenin chalcone; 2',4,4',6'-Tetrahydroxychalcone	Flavonoids	Chalcones	73692-50-9	1.177	2.43341	1.28298	up		Lmqn000351	C12H22O10	Rutinose	Others	Saccharides	90-74-4	1.39011	0.000650416	-10.5864	down
Smpn009074	C30H48O6	2,3,19,23-Tetrahydroxyurs-12-en-28-oic acid	Terpenoids	Triterpene	-	1.23888	0.354125	-1.49767	down		Lmsn011830	C30H46O5	2,19-Dihydroxy-3-oxours-12-en-28-oic acid	Terpenoids	Triterpene	176983-21-4	1.25618	0.363846	-1.4586	down		Lmhp012042	C21H38O4	2-Linoleoylglycerol	Lipids	Glycerol ester	3443-82-1	1.3342	0.496728	-1.00947	down		Wbmn009702	C30H48O5	2,3,23-Trihydroxyurs-12-en-28-oic acid	Terpenoids	Triterpene	-	1.38921	3.98999	1.99638	up
Hmjn003948	C30H48O5	2,3,6-Trihydroxyurs-12-en-28-oic acid (Madasiatic acid)	Terpenoids	Triterpene	26532-66-1	1.25878	0.263192	-1.92581	down		Smpn009074	C30H48O6	2,3,19,23-Tetrahydroxyurs-12-en-28-oic acid	Terpenoids	Triterpene	-	1.25248	0.277538	-1.84924	down		Zmjp000182	C7H16N4O2	N-Monomethyl-L-arginine	Amino acids and derivatives	Amino acids and derivatives	17035-90-4	1.37608	2.38158	1.25192	up		Smnp110489	C39H54O7	3-O-p-Coumaroyltormentic acid	Terpenoids	Triterpene	-	1.37535	0.480223	-1.05822	down
pme0295	C6H11NO3	4-Acetamidobutyric acid	Organic acids	Organic acids	3025-96-5	1.24765	3.57024	1.83602	up		Hmjn003948	C30H48O5	2,3,6-Trihydroxyurs-12-en-28-oic acid (Madasiatic acid)	Terpenoids	Triterpene	26532-66-1	1.25711	0.309442	-1.69226	down		MWSmce689	C19H32O2	Methyl linolenate	Lipids	Free fatty acids	301-00-8	1.35378	0.401128	-1.31787	down		Zmgn000447	C3H7O7P	3-Phospho-D-glyceric acid	Others	Saccharides	820-11-1	1.35516	2.26517	1.17962	up
Lmsn010659	C30H46O5	Annurcoic acid	Terpenoids	Triterpene	877995-09-0	1.25495	0.222962	-2.16513	down		Lmhp002001	C14H20N2O3	L-Valyl-L-Phenylalanine	Amino acids and derivatives	Amino acids and derivatives	3918-92-1	1.07747	2.08821	1.06226	up		MWS2430	C15H30O2	13-methylmyristic acid	Lipids	Free fatty acids	2485-71-4	1.3161	0.438197	-1.19035	down		Hmlp003068	C27H30O17	Meratin	Flavonoids	Flavones	27215-04-9	1.30647	2.5063	1.32556	up
Lmbn001364	C5H8O4	4-Hydroxy-2-Oxopentanoic Acid	Organic acids	Organic acids	3318-73-8	1.25527	2.20197	1.1388	up		Lmsn010659	C30H46O5	Annurcoic acid	Terpenoids	Triterpene	877995-09-0	1.25282	0.15505	-2.68919	down		Lmxp001668	C9H10O2	2-Methoxy-4-ethenylphenol	Phenolic acids	Phenolic acids	7786-61-0	1.3772	12493.4	13.6089	up		mws0369	C20H32O2	Arachidonic Acid	Lipids	Free fatty acids	506-32-1	1.37191	2.65527	1.40886	up
Lmsn011870	C36H58O11	Nigaichigoside F1	Terpenoids	Triterpene Saponin	95262-48-9	1.25098	0.42741	-1.22631	down		Lmsn011870	C36H58O11	Nigaichigoside F1	Terpenoids	Triterpene Saponin	95262-48-9	1.25682	0.343548	-1.54142	down		mws2623	C18H34O2	11-Octadecanoic acid(Vaccenic acid)	Lipids	Free fatty acids	506-17-2	1.3251	0.426738	-1.22858	down		Zmdp000446	C9H16N2O5S	γ-L-Glutamyl-S-methyl-L-cysteine	Amino acids and derivatives	Amino acids and derivatives	-	1.23934	0.466413	-1.10032	down
MWStz070	C9H11NO3	N-(2-Hydroxy-4-methoxyphenyl)acetamide	Alkaloids	Phenolamine	58469-06-0	1.24332	0.35762	-1.4835	down		pmb0808	C16H16O9	Esculetin-6-O-quinic acid	Lignans and Coumarins	Coumarins	-	1.05402	0.433966	-1.20434	down		Zmdp002216	C11H20N2O5	L-γ-Glutamyl-L-leucine	Amino acids and derivatives	Amino acids and derivatives	2566-39-4	1.33477	0.481517	-1.05434	down		mws0791	C28H34O14	Poncirin (Isosakuranetin-7-O-neohesperidoside)	Flavonoids	Flavanones	14941-08-3	1.16269	0.225433	-2.14923	down
Lmdp004267	C30H26O14	Quercetin-3-O-(6''-O-p-Coumaroyl)glucoside	Flavonoids	Flavonols	-	1.2572	0.47264	-1.08119	down		MWStz070	C9H11NO3	N-(2-Hydroxy-4-methoxyphenyl)acetamide	Alkaloids	Phenolamine	58469-06-0	1.23337	0.363259	-1.46093	down		Lmhp009590	C25H50NO7P	LysoPC 17:1	Lipids	LPC	-	1.32704	0.487631	-1.03614	down		Qmkp093004	C9H7NO	Indole-3-carboxaldehyde	Alkaloids	Plumerane	487-89-8	1.37732	3.13151	1.64686	up
pmb2871	C13H16O9	1-O-Gentisoyl-β-D-glucoside	Phenolic acids	Phenolic acids	23445-11-6	1.25467	0.383957	-1.38098	down		Lmdp004267	C30H26O14	Quercetin-3-O-(6''-O-p-Coumaroyl)glucoside	Flavonoids	Flavonols	-	1.25512	0.379956	-1.3961	down		pme0193	C5H10N2O3	L-Glutamine	Amino acids and derivatives	Amino acids and derivatives	56-85-9	1.34743	2.33502	1.22344	up		Lmhp010515	C25H52NO7P	LysoPC 17:0(2n isomer)	Lipids	LPC	-	1.39078	208055	17.6666	up
Hmtp000776	C8H9NO3	4,5,6-Trihydroxy-2-cyclohexen-1-ylideneacetonitrile	Alkaloids	Alkaloids	-	1.25768	0.308412	-1.69707	down		pmb2871	C13H16O9	1-O-Gentisoyl-β-D-glucoside	Phenolic acids	Phenolic acids	23445-11-6	1.25568	0.369039	-1.43815	down		pmn001610	C20H36O2	Eicosadienoic acid	Lipids	Free fatty acids	5598-38-9	1.24203	0.378158	-1.40294	down		Lmjp003090	C17H20O10	Isofraxidin-7-O-glucoside	Lignans and Coumarins	Coumarins	483-91-0	1.38461	2.99124	1.58075	up
HJN044	C45H36O18	Epicatechin-(4β→8,2β→O→7)-epicatechin-(4β→8)-epicatechin	Flavonoids	Flavanols	-	1.25879	0.000185212	-12.3985	down		Hmtp000776	C8H9NO3	4,5,6-Trihydroxy-2-cyclohexen-1-ylideneacetonitrile	Alkaloids	Alkaloids	-	1.25542	0.219249	-2.18936	down		pmb2643	C14H26O2	Myristoleic acid	Lipids	Free fatty acids	544-64-9	1.37668	0.424757	-1.23529	down		Zmjp012507	C41H70O14	3,12,23,25-tetrahydroxy-20S,24S-epoxydammarane-3-O-xylosylglucoside	Terpenoids	Triterpene Saponin	-	1.38892	238.042	7.89507	up
pme1383	C8H11NO3	Pyridoxine	Others	Vitamin	65-23-6	1.24748	0.460537	-1.11861	down		HJN044	C45H36O18	Epicatechin-(4β→8,2β→O→7)-epicatechin-(4β→8)-epicatechin	Flavonoids	Flavanols	-	1.19362	0.485952	-1.04111	down		Lmmp002080	C11H16N2O	N-(4-Aminobutyl)benzamide	Alkaloids	Alkaloids	5692-23-9	1.36851	0.359211	-1.47709	down		Lmsn006093	C28H28O14	Phloretin-2'-O-(2''-Galloyl)glucoside	Flavonoids	Chalcones	-	1.38924	3883.34	11.9231	up
Cmxp003975	C21H22O11	Okanin-4'-O-glucoside(Marein)	Flavonoids	Chalcones	535-96-6	1.25444	0.414229	-1.2715	down		pme1383	C8H11NO3	Pyridoxine	Others	Vitamin	65-23-6	1.218	0.437294	-1.19332	down		Lmqn000351	C12H22O10	Rutinose	Others	Saccharides	90-74-4	1.3776	0.000650416	-10.5864	down		Lmrj002793	C14H16N2O4	Cyclo(Phe-Glu)	Amino acids and derivatives	Amino acids and derivatives	-	1.39035	0.000583608	-10.7427	down
Lmsp004301	C21H22O11	3',5,5',7-Tetrahydroxyflavanone-7-O-glucoside	Flavonoids	Flavanones	-	1.25444	0.414229	-1.2715	down		Lmsp013456	C30H46O3	3-Hydroxytaraxastan-28,20-olide	Terpenoids	Triterpene	-	1.01109	0.37954	-1.39768	down		Wbmn009702	C30H48O5	2,3,23-Trihydroxyurs-12-en-28-oic acid	Terpenoids	Triterpene	-	1.37333	2.41057	1.26938	up		mws1198	C10H12O3	Methyl 3-(4-hydroxyphenyl)propionate	Phenolic acids	Phenolic acids	5597-50-2	1.31073	0.477031	-1.06785	down
Zjmp102717	C30H48O4	2,3-Dihydroxyolean-12-en-28-oic acid	Terpenoids	Triterpene	-	1.17053	0.227853	-2.13382	down		Cmxp003975	C21H22O11	Okanin-4'-O-glucoside(Marein)	Flavonoids	Chalcones	535-96-6	1.2526	0.43383	-1.2048	down		Lmsn000363	C16H22O7	Raspberryketone glucoside	Phenolic acids	Phenolic acids	38963-94-9	1.35023	2.74882	1.45881	up		pmp000596	C27H30O17	Quercetin-3-O-(2''-O-galactosyl)glucoside	Flavonoids	Flavonols	56782-99-1	1.39013	1805.8	10.8184	up
MWSmce119	C6H14N4O2	L-Arginine	Amino acids and derivatives	Amino acids and derivatives	74-79-3	1.25829	4.38089	2.13122	up		Lmsp004301	C21H22O11	3',5,5',7-Tetrahydroxyflavanone-7-O-glucoside	Flavonoids	Flavanones	-	1.2526	0.43383	-1.2048	down		Lmqp000329	C8H14N3O7P	5-Aminoimidazole ribonucleotide	Nucleotides and derivatives	Nucleotides and derivatives	25635-88-5	1.30692	0.41289	-1.27617	down		Lmbp000123	C6H13NO2S	L-Homomethionine	Amino acids and derivatives	Amino acids and derivatives	25148-30-5	1.33637	2.03088	1.0221	up
HX1191	C30H46O4	3,4-Secodammara-4(28),20,24-trien-3,26-dioic acid	Terpenoids	Triterpene	-	1.25764	0.392206	-1.35031	down		Zjmp102717	C30H48O4	2,3-Dihydroxyolean-12-en-28-oic acid	Terpenoids	Triterpene	-	1.19436	0.434569	-1.20234	down		pmf0139	C6H12O6	D-Galactose	Others	Saccharides	59-23-4	1.37456	2.31911	1.21357	up		pmp000269	C30H48O5	2,3,19-Trihydroxyolean-12-en-28-oic acid (Arjunic acid)	Terpenoids	Triterpene	31298-06-3	1.31177	0.488224	-1.03439	down
mad2085	C22H18O11	Caffeoyl-p-coumaroyltartaric acid	Phenolic acids	Phenolic acids	-	1.00192	0.450397	-1.15073	down		MWSmce119	C6H14N4O2	L-Arginine	Amino acids and derivatives	Amino acids and derivatives	74-79-3	1.25729	10.483	3.38998	up		Zmdp000292	C7H16N4O2	Arginine methyl ester	Amino acids and derivatives	Amino acids and derivatives	-	1.37458	2.43486	1.28384	up		Hmjn008136	C30H46O4	2,3-Dihydroxyoleana-11,13(18)-dien-28-oic acid (Camaldulenic acid)	Terpenoids	Triterpene	71850-15-2	1.387	0.434692	-1.20194	down
pmp001311	C27H30O17	6-Hydroxykaempferol-7,6-O-Diglucoside	Flavonoids	Flavonols	-	1.25714	0.159685	-2.6467	down		MWSslk252	C28H34O14	Didymin (Isosakuranetin-7-O-rutinoside)	Flavonoids	Flavanones	14259-47-3	1.20333	2.14633	1.10187	up		Lmmp003817	C24H22O14	Kaempferol-3-O-(6''-malonyl)glucoside	Flavonoids	Flavonols	-	1.3782	21993.6	14.4248	up		pmb3101	C7H12O5	2-Isopropylmalic Acid	Organic acids	Organic acids	49601-06-1	1.38898	2.86038	1.51621	up
Lmmn002179	C14H18O8	Methyl salicylate-2-O-glucoside	Phenolic acids	Phenolic acids	10019-60-0	1.25228	0.449516	-1.15356	down		mad2085	C22H18O11	Caffeoyl-p-coumaroyltartaric acid	Phenolic acids	Phenolic acids	-	1.24899	0.310128	-1.68906	down		pmb0530	C21H27N7O14P2	Nicotinic acid adenine dinucleotide	Nucleotides and derivatives	Nucleotides and derivatives	53-84-9	1.32642	2.46881	1.30381	up		pmn001669	C12H14O5	Methyl sinapate	Phenolic acids	Phenolic acids	20733-94-2	1.389	2.69597	1.43081	up
zjgp122321	C16H18O9	4-O-acetyl-3-O-caffeoyl-2-C-methyl-D-erythronate	Others	Others	-	1.24672	0.419483	-1.25331	down		pmp001311	C27H30O17	6-Hydroxykaempferol-7,6-O-Diglucoside	Flavonoids	Flavonols	-	1.25634	0.133975	-2.89996	down		pme0321	C21H20O10	Kaempferol-7-O-rhamnoside	Flavonoids	Flavonols	20196-89-8	1.37738	518.553	9.01835	up		Lmhp008833	C24H48NO7P	LysoPC 16:1(2n isomer)	Lipids	LPC	-	1.30895	2.74931	1.45907	up
Lskp211472	C30H46O6	2,3,19-Trihydroxy-24-oxo-olean-12-en-28-oic acid	Terpenoids	Triterpene	-	1.2587	0.21509	-2.21699	down		Lmmn002179	C14H18O8	Methyl salicylate-2-O-glucoside	Phenolic acids	Phenolic acids	10019-60-0	1.2445	0.41563	-1.26663	down		pmb2406	C25H52NO7P	LysoPC 17:0	Lipids	LPC	50930-23-9	1.36985	0.4787	-1.06281	down		mws0748	C16H18O9	1-Caffeoylquinic acid	Phenolic acids	Phenolic acids	1241-87-8	1.39026	0.000121212	-13.0102	down
Zjmp102710	C30H46O4	3-Hydroxy-29(or30)-al-olean-12-en-28-oic acid	Terpenoids	Triterpene	-	1.18001	0.173047	-2.53076	down		zjgp122321	C16H18O9	4-O-acetyl-3-O-caffeoyl-2-C-methyl-D-erythronate	Others	Others	-	1.25257	0.435001	-1.20091	down		pmb0874	C23H44NO7P	LysoPE 18:2(2n isomer)	Lipids	LPE	-	1.36057	0.482685	-1.05085	down		MWSmce035	C30H46O5	3,16-Dihydroxy-23-oxoolean-12-en-28-oic acid (Quillaic acid)	Terpenoids	Triterpene	631-01-6	1.38955	0.487741	-1.03581	down
Lmhp009769	C22H44NO7P	LysoPE 17:1	Lipids	LPE	-	1.25927	1743.33	10.7676	up		Lskp211472	C30H46O6	2,3,19-Trihydroxy-24-oxo-olean-12-en-28-oic acid	Terpenoids	Triterpene	-	1.25677	0.216247	-2.20925	down		Wmln000659	C10H10O4	3-Methyl-4,8-dihydroxy-3,4-dihydroisocoumarin	Phenolic acids	Phenolic acids	33788-22-6	1.29618	5.21956	2.38393	up		Zasn010433	C20H36O2	9,12-Octadecadienoic acid,ethyl ester	Others	Others	6114-21-2	1.23237	2.06453	1.04582	up
Zmcp002666	C27H30O17	Quercetin-3,7-Di-O-glucoside	Flavonoids	Flavonols	-	1.25904	0.153122	-2.70725	down		Zjmp102710	C30H46O4	3-Hydroxy-29(or30)-al-olean-12-en-28-oic acid	Terpenoids	Triterpene	-	1.17889	0.168602	-2.56831	down		Li512115	C25H24O12	Isochlorogenic acid B	Phenolic acids	Phenolic acids	14534-61-3	1.21331	2.09085	1.06409	up		pmb3061	C22H28O13	5-O-p-Coumaroylquinic acid O-glucoside	Phenolic acids	Phenolic acids	-	1.37191	0.00427793	-7.86887	down
Lmpp005784	C21H20O12	6-Methoxyquercetin-3-O-Xyloside	Flavonoids	Flavonols	-	1.24258	0.176621	-2.50127	down		Lhbp111733	C26H32O11	Matairesinol-4'-O-glucoside (Matairesinoside)	Lignans and Coumarins	Lignans	23202-85-9	1.25048	0.498473	-1.00441	down		Zmdp000446	C9H16N2O5S	γ-L-Glutamyl-S-methyl-L-cysteine	Amino acids and derivatives	Amino acids and derivatives	-	1.35155	3.08219	1.62395	up		pmb2855	C11H20N2O8	L-Glutamine-O-glycoside	Amino acids and derivatives	Amino acids and derivatives	-	1.36996	0.107879	-3.21252	down
Hmpp003270	C21H20O11	Luteolin-4'-O-glucoside	Flavonoids	Flavones	6920-38-3	1.25224	0.160114	-2.64283	down		Zblp001009	C12H17NO6	3-pyridine-methanol-O-β-D-glucopyranosyl	Alkaloids	Pyridine alkaloids	-	1.25523	0.486245	-1.04025	down		Lmhp010515	C25H52NO7P	LysoPC 17:0(2n isomer)	Lipids	LPC	-	1.37829	57928.7	15.822	up		Lmyn003971	C26H34O11	Dihydrodehydrodiconiferyl alcohol-4-O-glucoside	Lignans and Coumarins	Lignans	-	1.37691	2.58287	1.36898	up
MWSmce294	C12H16O3	Elemicin	Phenolic acids	Phenolic acids	487-11-6	1.25002	0.000256907	-11.9265	down		Zmcp002666	C27H30O17	Quercetin-3,7-Di-O-glucoside	Flavonoids	Flavonols	-	1.25702	0.129197	-2.95236	down		YC512112	C16H24O5N2	Anabasine-glucoside	Alkaloids	Pyridine alkaloids	-	1.27121	3.25165	1.70117	up		mws1290	C30H26O13	Kaempferol-3-O-(6''-p-Coumaroyl)glucoside (Tiliroside)	Flavonoids	Flavonols	20316-62-5	1.38507	4759.6	12.2166	up
Li512114	C31H50O4	2,3-Dihydroxyurs-12-en-28-oic acid methyl ester (Corosolic acid methyl ester)	Terpenoids	Triterpene	4518-70-1	1.25739	0.456187	-1.1323	down		Lmpp005784	C21H20O12	6-Methoxyquercetin-3-O-Xyloside	Flavonoids	Flavonols	-	1.24984	0.12995	-2.94397	down		Lmsn010604	C30H46O6	2,3,19-Trihydroxyurs-12-en-23-formyl-28-oic Acid	Terpenoids	Triterpene	-	1.25623	2.30484	1.20467	up		Zmgn001448	C7H12O5	2-Propylmalic Acid	Organic acids	Organic acids	-	1.35576	2.63653	1.39864	up
Lmbn001162	C15H16O9	Esculetin-7-O-glucoside	Lignans and Coumarins	Coumarins	-	1.25819	0.00227902	-8.77737	down		Hmpp003270	C21H20O11	Luteolin-4'-O-glucoside	Flavonoids	Flavones	6920-38-3	1.2489	0.194748	-2.36032	down		Lmjp003090	C17H20O10	Isofraxidin-7-O-glucoside	Lignans and Coumarins	Coumarins	483-91-0	1.3524	2.25721	1.17454	up		Lmbn001754	C7H12O5	3-Isopropylmalic Acid	Organic acids	Organic acids	921-28-8	1.35576	2.63653	1.39864	up
Lmdp003286	C21H20O12	Isohyperoside	Flavonoids	Flavonols	35589-21-0	1.25369	0.485349	-1.0429	down		MWSmce294	C12H16O3	Elemicin	Phenolic acids	Phenolic acids	487-11-6	1.24823	0.000256907	-11.9265	down		Zmjp012507	C41H70O14	3,12,23,25-tetrahydroxy-20S,24S-epoxydammarane-3-O-xylosylglucoside	Terpenoids	Triterpene Saponin	-	1.36663	173.683	7.44031	up		pmb2497	C9H10O5	4-Hydroxy-3-methoxymandelate	Phenolic acids	Phenolic acids	55-10-7	1.2619	2.60842	1.38318	up
mws0362	C17H34O2	Heptadecanoic acid	Lipids	Free fatty acids	506-12-7	1.25787	9.73226e-05	-13.3269	down		Zbzp007301	C18H28O3	2-Methoxy-6-undecyl-1,4-benzoquinone	Quinones	Quinones	-	1.2534	3.42316	1.77533	up		Lmyp004407	C30H26O13	Kaempferol-3-O-(2''-p-Coumaroyl)galactoside	Flavonoids	Flavonols	-	1.37262	2021.89	10.9815	up		mws1305	C12H11N5	6-Benzylaminopurine	Nucleotides and derivatives	Nucleotides and derivatives	1214-39-7	1.36457	2.00015	1.00011	up
MWSmce056	C11H12N2O2	DL-Tryptophan	Amino acids and derivatives	Amino acids and derivatives	54-12-6	1.25762	0.198496	-2.33282	down		Li512114	C31H50O4	2,3-Dihydroxyurs-12-en-28-oic acid methyl ester (Corosolic acid methyl ester)	Terpenoids	Triterpene	4518-70-1	1.25646	0.369135	-1.43778	down		Lmsn006093	C28H28O14	Phloretin-2'-O-(2''-Galloyl)glucoside	Flavonoids	Chalcones	-	1.37625	5470.12	12.4174	up		pma0795	C24H22O15	Tricetin-5-O-(6''-malonyl)glucoside	Flavonoids	Flavones	-	1.39021	0.000241822	-12.0138	down
Lmhp008742	C28H48NO7P	LysoPC 20:5	Lipids	LPC	162440-04-2	1.25883	961.145	9.90861	up		Hmjn004446	C30H26O13	Luteolin-7-O-(6''-caffeoyl)rhamnoside	Flavonoids	Flavones	-	1.25171	2.43457	1.28367	up		pmb0854	C26H48NO7P	LysoPC 18:3	Lipids	LPC	-	1.37809	2.63097e-05	-15.214	down		Hmjp003416	C30H48O6	2,3,6,23-Tetrahydroxyolean-12-en-28-oic acid (Terminolic acid)	Terpenoids	Triterpene	564-13-6	1.38788	0.435255	-1.20007	down
HJN106	C30H46O5	2-Carboxy-3-hydroxy-A(1)-norlupan-20(29)-en-28-oic acid (Ceanothic acid)	Terpenoids	Triterpene	21302-79-4	1.18578	0.41005	-1.28613	down		Lmdp003286	C21H20O12	Isohyperoside	Flavonoids	Flavonols	35589-21-0	1.24965	0.453079	-1.14216	down		Lmrj002793	C14H16N2O4	Cyclo(Phe-Glu)	Amino acids and derivatives	Amino acids and derivatives	-	1.37784	0.000583608	-10.7427	down		pme0170	C8H16N4O3	N-Acetyl-L-Arginine	Amino acids and derivatives	Amino acids and derivatives	155-84-0	1.39082	13932.7	13.7662	up
pma0702	C29H39N3O8	N1,N8-Bis(sinapoyl)spermidine	Alkaloids	Phenolamine	-	1.17134	0.340759	-1.55317	down		pmb0325	C17H27N3O3	Feruloylspermidine	Alkaloids	Phenolamine	-	1.25733	1.82568e-05	-15.7412	down		mws1198	C10H12O3	Methyl 3-(4-hydroxyphenyl)propionate	Phenolic acids	Phenolic acids	5597-50-2	1.34576	0.452341	-1.14452	down		Lmbn001181	C22H28O15	Fraxetin-7,8-di-O-glucoside	Lignans and Coumarins	Coumarins	-	1.38052	3.19376	1.67526	up
MWS20145	C21H22O11	Eriodictyol-7-O-glucoside	Flavonoids	Flavanones	38965-51-4	1.24673	0.422498	-1.24298	down		mws0362	C17H34O2	Heptadecanoic acid	Lipids	Free fatty acids	506-12-7	1.25607	9.73226e-05	-13.3269	down		Lmbp000123	C6H13NO2S	L-Homomethionine	Amino acids and derivatives	Amino acids and derivatives	25148-30-5	1.35234	2.98055	1.57558	up		MWSHY0077	C15H10O6	Fisetin	Flavonoids	Flavonols	528-48-3	1.3828	1433.21	10.485	up
mws5037	C9H18N2O3	L-Alanyl-L-leucine	Amino acids and derivatives	Amino acids and derivatives	3303-34-2	1.24474	2.54992	1.35045	up		MWSmce056	C11H12N2O2	DL-Tryptophan	Amino acids and derivatives	Amino acids and derivatives	54-12-6	1.25547	0.183398	-2.44695	down		Lmhp008744	C33H56O14	1-α-Linolenoyl-glycerol-2,3-di-O-glucoside	Lipids	Glycerol ester	-	1.29709	0.261487	-1.93519	down		Lmmn002274	C26H34O11	Isolariciresinol-9'-O-glucoside	Lignans and Coumarins	Lignans	63358-12-3	1.3407	2.3734	1.24695	up
mws0914	C15H12O5	3,5,7-Trihydroxyflavanone (Pinobanksin)	Flavonoids	Flavanonols	548-82-3	1.24873	5.85396	2.54941	up		Zmgn000216	C2H7O4P	2-Hydroxyethylphosphonic acid	Organic acids	Organic acids	22987-21-9	1.2457	0.000366775	-11.4128	down		Lmhp011562	C21H36O4	1-α-Linolenoyl-glycerol	Lipids	Glycerol ester	-	1.37351	0.403519	-1.30929	down		Lmsn004162	C22H22O12	1-O-Galloyl-2-O-p-Coumaroyl-β-D-glucose	Phenolic acids	Phenolic acids	94356-18-0	1.388	0.00182221	-9.10009	down
Hmln101664	C32H42O17	Nortrachelogenin-4'-O-gentiobioside	Lignans and Coumarins	Lignans	-	1.20406	0.183018	-2.44994	down		HJN106	C30H46O5	2-Carboxy-3-hydroxy-A(1)-norlupan-20(29)-en-28-oic acid (Ceanothic acid)	Terpenoids	Triterpene	21302-79-4	1.19512	0.384878	-1.37753	down		mws0748	C16H18O9	1-Caffeoylquinic acid	Phenolic acids	Phenolic acids	1241-87-8	1.37771	0.000121212	-13.0102	down		pme2165	C5H4N2O4	Orotic acid (Vitamin B13)	Others	Vitamin	65-86-1	1.39053	10196.5	13.3158	up
pmn001367	C13H16O9	Protocatechuic acid-4-O-glucoside	Phenolic acids	Phenolic acids	-	1.25771	0.348253	-1.52179	down		pma0702	C29H39N3O8	N1,N8-Bis(sinapoyl)spermidine	Alkaloids	Phenolamine	-	1.19315	0.165297	-2.59687	down		Lmhp008801	C23H42NO7P	LysoPE 18:3	Lipids	LPE	-	1.36934	0.460018	-1.12024	down		Zmyn000155	C7H14N2O3	N-α-Acetyl-L-ornithine	Amino acids and derivatives	Amino acids and derivatives	6205-08-9	1.32477	2.99476	1.58244	up
Zazp002547	C11H12N2O2	cyclo-(Gly-Phe)	Amino acids and derivatives	Amino acids and derivatives	10125-07-2	1.25334	0.220302	-2.18245	down		MWS20145	C21H22O11	Eriodictyol-7-O-glucoside	Flavonoids	Flavanones	38965-51-4	1.24033	0.478456	-1.06354	down		pmb2987	C24H24O11	Acacetin-7-O-(6''-O-acetyl)glucoside	Flavonoids	Flavones	-	1.37566	945.228	9.88452	up		Lmzp009620	C39H54O7	2-Hydroxypyracrenic acid	Terpenoids	Triterpene	-	1.37617	0.448175	-1.15787	down
MWS20152	C22H26O8	Syringaresinol	Lignans and Coumarins	Lignans	21453-71-4	1.2571	0.194224	-2.36421	down		mws5037	C9H18N2O3	L-Alanyl-L-leucine	Amino acids and derivatives	Amino acids and derivatives	3303-34-2	1.24368	3.1537	1.65705	up		Lmqp008175	C10H10O2	Methyl Cinnamate	Phenolic acids	Phenolic acids	103-26-4	1.3782	0.000132822	-12.8782	down		pme3009	C6H6O6	Trans-Citridic acid	Organic acids	Organic acids	4023-65-8	1.39057	60658.6	15.8884	up
pma6460	C16H18O8	4-O-p-Coumaroylquinic acid	Phenolic acids	Phenolic acids	32451-86-8	1.2466	2.09849	1.06935	up		Hmln101664	C32H42O17	Nortrachelogenin-4'-O-gentiobioside	Lignans and Coumarins	Lignans	-	1.14253	0.493295	-1.01948	down		Zasn010433	C20H36O2	9,12-Octadecadienoic acid,ethyl ester	Others	Others	6114-21-2	1.31861	0.451518	-1.14714	down		MWSHY0019	C28H34O15	Hesperetin-7-O-neohesperidoside(Neohesperidin)	Flavonoids	Flavanones	13241-33-3	1.3824	4780.69	12.223	up
Hmyp002656	C11H11NO4	Methyl dioxindole-3-acetate	Alkaloids	Plumerane	57061-18-4	1.23907	0.409943	-1.2865	down		pmn001367	C13H16O9	Protocatechuic acid-4-O-glucoside	Phenolic acids	Phenolic acids	-	1.25436	0.340131	-1.55584	down		pmb3061	C22H28O13	5-O-p-Coumaroylquinic acid O-glucoside	Phenolic acids	Phenolic acids	-	1.36002	0.00427793	-7.86887	down		pmp000782	C39H54O7	Caffeoylmaslinic Acid	Terpenoids	Triterpene	-	1.35233	0.470607	-1.08741	down
Lmyn011818	C30H44O4	3,19-Epoxy-3,22-dihydroxydammara-20,24-dien-26-oic acid δ-lactone (Semialactone)	Terpenoids	Triterpene	366450-46-6	1.25389	2568.71	11.3268	up		Zazp002547	C11H12N2O2	cyclo-(Gly-Phe)	Amino acids and derivatives	Amino acids and derivatives	10125-07-2	1.25377	0.186675	-2.4214	down		Zmfn000481	C14H22N2O16P2	Uridine-5'-Diphosphate-D-Xylose	Nucleotides and derivatives	Nucleotides and derivatives	3616-06-6	1.36377	2.14019	1.09774	up		Lmfn003760	C21H18O13	Quercetin-4'-O-glucuronide	Flavonoids	Flavonols	201463-36-7	1.09931	0.440195	-1.18378	down
mws1164	C6H12O6	D-Fructose	Others	Saccharides	57-48-7	1.25195	2.08555	1.06043	up		MWS20152	C22H26O8	Syringaresinol	Lignans and Coumarins	Lignans	21453-71-4	1.2537	0.120825	-3.04901	down		Lmyn003971	C26H34O11	Dihydrodehydrodiconiferyl alcohol-4-O-glucoside	Lignans and Coumarins	Lignans	-	1.12733	3.02065	1.59486	up		pmp000781	C39H54O6	p-Coumaroyleuscaphic acid	Terpenoids	Triterpene	-	1.38749	10953.1	13.4191	up
pme2831	C4H11N5	1,1-Dimethylbiguanide	Alkaloids	Alkaloids	657-24-9	1.25342	13914.2	13.7643	up		pmn001572	C24H28O10	Agrimonolide-6-O-glucoside	Lignans and Coumarins	Coumarins	126223-29-8	1.2522	3.15822	1.65911	up		pmf0138	C6H12O6	D-Mannose	Others	Saccharides	3458-28-4	1.35361	2.62673	1.39327	up		Zmpn000095	C6H15O9P	Sorbitol-6-phosphate	Others	Saccharides	20479-58-7	1.31932	2.75098	1.45995	up
pmp000780	C40H56O8	3-O-Feruloyleuscaphic acid	Terpenoids	Triterpene	-	1.1178	0.440201	-1.18377	down		Hmyp002656	C11H11NO4	Methyl dioxindole-3-acetate	Alkaloids	Plumerane	57061-18-4	1.25605	0.361885	-1.4664	down		pmb2922	C15H24N2O17P2	Uridine 5'-diphospho-D-glucose	Nucleotides and derivatives	Nucleotides and derivatives	133-89-1	1.37223	2.27919	1.18852	up		MWS4471	C6H10N2O4	N-Alpha-Acetyl-L-Asparagine	Amino acids and derivatives	Amino acids and derivatives	4033-40-3	1.12661	2.08207	1.05802	up
ML10177402	C7H7NO3	4-Aminosalicylic acid	Phenolic acids	Phenolic acids	65-49-6	1.10601	0.445126	-1.16771	down		Lmyn011818	C30H44O4	3,19-Epoxy-3,22-dihydroxydammara-20,24-dien-26-oic acid δ-lactone (Semialactone)	Terpenoids	Triterpene	366450-46-6	1.25386	3320.18	11.697	up		mws1290	C30H26O13	Kaempferol-3-O-(6''-p-Coumaroyl)glucoside (Tiliroside)	Flavonoids	Flavonols	20316-62-5	1.37269	7070.94	12.7877	up		Lmhn003801	C25H24O13	Feruloylsinapoyltartaric acid	Phenolic acids	Phenolic acids	-	1.3866	2.57257	1.36321	up
mws0250	C9H11NO3	L-Tyrosine	Amino acids and derivatives	Amino acids and derivatives	60-18-4	1.25497	0.396989	-1.33283	down		pmn001650	C60H50O24	Cinnamtannin B2	Tannins	Tannin	88038-12-4	1.23589	0.371148	-1.42993	down		Lmhp112042	C21H38O4	1-Linoleoylglycerol	Lipids	Glycerol ester	2277-28-3	1.34929	0.396929	-1.33305	down		Wmqn000814	C16H16O10	6,7-Dihydroxycoumarin-7-O-(6'-acetyl)glucoside	Lignans and Coumarins	Coumarins	-	1.15429	2.2753	1.18606	up
Zmjp012331	C30H48O3	Lupa-12,20(29)-diene-3,27,28-triol (Oleanderol)	Terpenoids	Triterpene	114906-01-3	1.25635	3174.94	11.6325	up		pme2831	C4H11N5	1,1-Dimethylbiguanide	Alkaloids	Alkaloids	657-24-9	1.25458	23336.8	14.5103	up		mws2627	C16H12O7	Tamarixetin (3,3',5,7-Tetrahydroxy-4'-Methoxyflavone)	Flavonoids	Flavonols	603-61-2	1.36943	905.343	9.82232	up		Lmjp002764	C11H10O5	Umckalin (7-hydroxy-5,6-dimethoxycoumarin)	Lignans and Coumarins	Coumarins	43053-62-9	1.37207	2.54438	1.34731	up
pme2253	C6H10O6	L-Gulono-1,4-Lactone	Others	Saccharides	1128-23-0	1.24022	0.42731	-1.22665	down		mws0250	C9H11NO3	L-Tyrosine	Amino acids and derivatives	Amino acids and derivatives	60-18-4	1.2541	0.390679	-1.35594	down		Lmmp003903	C23H22O12	Kaempferol-3-O-(2''-O-acetyl)glucoside	Flavonoids	Flavonols	-	1.36548	0.00233242	-8.74396	down		pmc0066	C10H13N4O7P	2'-Deoxyinosine-5'-monophosphate	Nucleotides and derivatives	Nucleotides and derivatives	3393-18-8	1.36887	2.77893	1.47453	up
Lmsn009824	C30H48O6	2,3,19,23-Tetrahydroxyolean-12-en-28-oic acid	Terpenoids	Triterpene	55306-03-1	1.24095	0.207263	-2.27046	down		Zmjp012331	C30H48O3	Lupa-12,20(29)-diene-3,27,28-triol (Oleanderol)	Terpenoids	Triterpene	114906-01-3	1.25427	2814.57	11.4587	up		Lssp210357	C30H40O14	Pierisoid B	Others	Saccharides	-	1.37711	0.00117737	-9.73022	down		Hmcp002123	C10H8O4	Isoscopoletin (6-Hydroxy-7-Methoxycoumarin)	Lignans and Coumarins	Coumarins	776-86-3	1.25034	2.66656	1.41498	up
pme1228	C11H12N2O3	5-Hydroxy-L-tryptophan	Amino acids and derivatives	Amino acids and derivatives	56-69-9	1.25403	0.385599	-1.37483	down		Lmsn009824	C30H48O6	2,3,19,23-Tetrahydroxyolean-12-en-28-oic acid	Terpenoids	Triterpene	55306-03-1	1.25631	0.0944394	-3.40447	down		Lssp210234	C33H42O12	13-de cinnamoyl-9-de acetyl Taxus Yunting B	Others	Others	-	1.37239	230.571	7.84907	up		zjmp120215	C30H46O4	3,25-Epoxy-3-hydroxyurs-12-en-28-oic acid (Lantic acid)	Terpenoids	Triterpene	-	1.35437	6.94258	2.79547	up
mws0582	C11H19N3O6S	S-(Methyl)glutathione	Amino acids and derivatives	Amino acids and derivatives	2922-56-7	1.25691	8265.54	13.0129	up		pme1228	C11H12N2O3	5-Hydroxy-L-tryptophan	Amino acids and derivatives	Amino acids and derivatives	56-69-9	1.22109	0.353232	-1.50131	down		pma1840	C14H20NO3+	4-Coumaroylcholine	Alkaloids	Phenolamine	-	1.37737	504.15	8.97771	up		Lmhn003799	C24H22O12	Feruloylferuloyltartaric acid	Phenolic acids	Phenolic acids	-	1.26191	3.15017	1.65543	up
pme3188	C9H13N2O9P	Uridine 5'-monophosphate	Nucleotides and derivatives	Nucleotides and derivatives	58-97-9	1.22812	2.63899	1.39998	up		mws0582	C11H19N3O6S	S-(Methyl)glutathione	Amino acids and derivatives	Amino acids and derivatives	2922-56-7	1.25393	9209.56	13.1689	up		MWS0559	C6H10O5	1,6-anhydro-β-D-glucose	Others	Saccharides	498-07-7	1.33901	2.30863	1.20704	up		Lmsn006130	C36H56O12	2,3,19-Trihydroxyurs-12-en-23,28-dioic acid-28-O-glucoside	Terpenoids	Triterpene Saponin	-	1.02939	2.78736	1.4789	up
pme0256	C5H4N4O2	Xanthine	Nucleotides and derivatives	Nucleotides and derivatives	69-89-6	1.17234	2.32875	1.21956	up		pme3188	C9H13N2O9P	Uridine 5'-monophosphate	Nucleotides and derivatives	Nucleotides and derivatives	58-97-9	1.21175	2.12068	1.08453	up		mws4085	C11H12O5	Sinapic acid	Phenolic acids	Phenolic acids	530-59-6	1.36272	2.92125	1.54659	up		mws1478	C10H14N2	Nicotine	Alkaloids	Pyridine alkaloids	54-11-5	1.16781	0.414598	-1.27022	down
pme2960	C15H12O5	Naringenin chalcone; 2',4,4',6'-Tetrahydroxychalcone	Flavonoids	Chalcones	73692-50-9	1.25022	7.77779	2.95936	up		pme2960	C15H12O5	Naringenin chalcone; 2',4,4',6'-Tetrahydroxychalcone	Flavonoids	Chalcones	73692-50-9	1.25381	2.52515	1.33637	up		pme0170	C8H16N4O3	N-Acetyl-L-Arginine	Amino acids and derivatives	Amino acids and derivatives	155-84-0	1.3762	22800.9	14.4768	up		HJAP156	C22H22O12	Laricitrin-3-O-rhamnoside	Flavonoids	Flavonols	-	1.37788	0.340239	-1.55538	down
Lmsn009238	C30H48O6	1,2,3,19-Tetrahydroxyurs-12-en-28-oic acid	Terpenoids	Triterpene	120211-98-5	1.25681	0.201679	-2.30987	down		MWSmce017	C9H6O4	Daphnetin	Lignans and Coumarins	Coumarins	486-35-1	1.04851	0.410738	-1.28371	down		MWSHY0121	C21H18O12	Luteolin-7-O-glucuronide	Flavonoids	Flavones	29741-10-4	1.37178	0.00134702	-9.53602	down		MWS20151	C15H10O5	Apigenin; 4',5,7-Trihydroxyflavone	Flavonoids	Flavones	520-36-5	1.38608	562.549	9.13583	up
pme1292	C8H8O4	Homogentisic acid	Phenolic acids	Phenolic acids	451-13-8	1.25755	0.496578	-1.00991	down		Lmsn009238	C30H48O6	1,2,3,19-Tetrahydroxyurs-12-en-28-oic acid	Terpenoids	Triterpene	120211-98-5	1.25574	0.406896	-1.29727	down		mws0034	C22H18O11	Epigallocatechin-3-gallate	Flavonoids	Flavanols	989-51-5	1.37429	735.691	9.52296	up		Lmbp003208	C17H20O10	Fraxidin-8-O-glucoside	Lignans and Coumarins	Coumarins	-	1.22383	3.83023	1.93743	up
mws2108	C16H18O9	Cryptochlorogenic acid (4-O-Caffeoylquinic acid)	Phenolic acids	Phenolic acids	905-99-7	1.25884	0.359779	-1.47482	down		pme1292	C8H8O4	Homogentisic acid	Phenolic acids	Phenolic acids	451-13-8	1.25144	0.422158	-1.24415	down		Lmhp009187	C20H42NO7P	LysoPE 15:0	Lipids	LPE	-	1.34395	0.447537	-1.15992	down		mws1565	C17H24O10	Geniposide	Terpenoids	Monoterpenoids	24512-63-8	1.35247	4.8868	2.28889	up
Lmwp102713	C14H16O5	(S)-Peucedanol	Lignans and Coumarins	Coumarins	-	1.25486	0.19307	-2.3728	down		mws2108	C16H18O9	Cryptochlorogenic acid (4-O-Caffeoylquinic acid)	Phenolic acids	Phenolic acids	905-99-7	1.25447	0.348236	-1.52186	down		pmb0618	C28H34O16	Hesperetin-8-C-glucoside-3'-O-glucoside	Flavonoids	Flavonols	-	1.37796	2148.47	11.0691	up		pme2776	C10H12N4O4	2'-Deoxyinosine	Nucleotides and derivatives	Nucleotides and derivatives	890-38-0	1.36488	2.32428	1.21678	up
Ymjm000152	C12H16O7	p-Hydroxypheny-β-D-allopyranoside	Phenolic acids	Phenolic acids	-	1.24986	0.456331	-1.13185	down		Lmwp102713	C14H16O5	(S)-Peucedanol	Lignans and Coumarins	Coumarins	-	1.22256	0.174266	-2.52063	down		Lmbn001181	C22H28O15	Fraxetin-7,8-di-O-glucoside	Lignans and Coumarins	Coumarins	-	1.34578	2.56062	1.3565	up		Zmxn004201	C36H58O10	Rosamultin	Terpenoids	Triterpene Saponin	88515-58-6	1.327	3.91409	1.96868	up
Lmmp001947	C21H20O13	Gossypetin-3-O-glucoside	Flavonoids	Flavonols	-	1.25081	0.0314637	-4.99017	down		Ymjm000152	C12H16O7	p-Hydroxypheny-β-D-allopyranoside	Phenolic acids	Phenolic acids	-	1.25553	0.397556	-1.33077	down		Ymjm000140	C17H20O9	3-O-Caffeoylquinic acid methyl ester	Phenolic acids	Phenolic acids	123483-19-2	1.37765	2316.15	11.1775	up		Lmjp003822	C26H26O12	3,5-O-Dicaffeoylquinic Acid Methyl Ester	Phenolic acids	Phenolic acids	159934-13-1	1.30098	2.01439	1.01034	up
Lmfp003403	C21H20O13	Quercetagetin-7-O-glucoside(Quercetagitrin)	Flavonoids	Flavonols	548-75-4	1.25081	0.0314637	-4.99017	down		Lmmp001947	C21H20O13	Gossypetin-3-O-glucoside	Flavonoids	Flavonols	-	1.24025	0.117185	-3.09314	down		Hagn002504	C19H16O7	5,7,5'-Trimethoxy-3',4'-methylenedioxyflavonoid	Flavonoids	Flavones	-	1.3035	2.17399	1.12034	up		Lmpp005842	C22H22O12	6-Methoxyquercetin-3-O-rhamnoside	Flavonoids	Flavonols	-	1.24569	0.365789	-1.45092	down
pmn001705	C30H48O4	3,24-Dihydroxy-17,21-semiacetal-12(13)oleanolic fruit	Terpenoids	Triterpene	-	1.25563	0.446377	-1.16366	down		Lmfp003403	C21H20O13	Quercetagetin-7-O-glucoside(Quercetagitrin)	Flavonoids	Flavonols	548-75-4	1.24025	0.117185	-3.09314	down		Lmsp102504	C21H20O9	Chrysophanol-8-O-β-D-galactoside	Quinones	Anthraquinone	-	1.37826	10764.1	13.3939	up		Zmyn000110	C6H14NO8P	D-Glucosamine 1-phosphate	Others	Saccharides	2152-75-2	1.36604	2.1027	1.07225	up
pme3443	C11H12O4	Sinapinaldehyde	Phenolic acids	Phenolic acids	4206-58-0	1.23129	3.46784	1.79404	up		mws0789	C15H12O4	Pinocembrin (Dihydrochrysin)	Flavonoids	Flavanones	480-39-7	1.25747	0.000462192	-11.0792	down		Lmsp102505	C21H20O9	Chrysophanol-8-O-β-D-glucoside	Quinones	Anthraquinone	-	1.37826	10764.1	13.3939	up		MWSmce577	C12H14O3	(E)-Ethyl p-methoxycinnamate	Phenolic acids	Phenolic acids	24393-56-4	1.39026	0.000273696	-11.8351	down
Lmhp012042	C21H38O4	2-Linoleoylglycerol	Lipids	Glycerol ester	3443-82-1	1.2326	2.36424	1.24137	up		pme3443	C11H12O4	Sinapinaldehyde	Phenolic acids	Phenolic acids	4206-58-0	1.23526	2.81019	1.49067	up		Zamn00402	C6H12O6	sorbose	Others	Saccharides	3615-56-3	1.36612	2.64243	1.40186	up		MWSslk146	C27H30O15	4'-O-Glucosylvitexin	Flavonoids	Flavones	38950-94-6	1.27285	2.37156	1.24584	up
mws1051	C15H23N6O5S+	S-Adenosylmethionine	Amino acids and derivatives	Amino acids and derivatives	485-80-3	1.24518	2.10925	1.07673	up		Lmqp013490	C30H48O3	3-Hydroxyolean-12-en-24-oic acid (α-Boswellic acid)	Terpenoids	Triterpene	471-66-9	1.22978	3.11668	1.64001	up		mws0179	C17H20O9	Chlorogenic acid methyl ester	Phenolic acids	Phenolic acids	29708-87-0	1.37799	6981.78	12.7694	up		pmn001642	C23H20O13	Kaempferol-3-O-(2''-O-acetyl)glucuronide	Flavonoids	Flavonols	-	1.38638	0.000256062	-11.9312	down
Lmqp013490	C30H48O3	3-Hydroxyolean-12-en-24-oic acid (α-Boswellic acid)	Terpenoids	Triterpene	471-66-9	1.19734	3.17405	1.66632	up		pmp001309	C21H20O12	6-Hydroxykaempferol-7-O-glucoside	Flavonoids	Flavonols	-	1.24422	0.434473	-1.20266	down		Hmgp003641	C28H32O14	Chrysoeriol-6-C-rhamnoside-7-O-rhamnoside	Flavonoids	Flavones	-	1.00407	2.22101	1.15121	up		Lmnp002741	C27H30O14	Genkwanin-6-C-(2''-O-apiosyl)glucoside	Flavonoids	Flavones	-	1.38496	1111.67	10.1185	up
pmp001309	C21H20O12	6-Hydroxykaempferol-7-O-glucoside	Flavonoids	Flavonols	-	1.25688	0.473689	-1.07799	down		Smgp004575	C21H20O12	Quercetin-5-O-β-D-glucoside	Flavonoids	Flavonols	-	1.24562	0.444761	-1.1689	down		Lmhp009526	C27H46O9	2-α-Linolenoyl-glycerol-1-O-glucoside	Lipids	Glycerol ester	-	1.18031	0.374431	-1.41723	down		MWSmce025	C16H18O10	Fraxetin-8-O-glucoside (Fraxin)	Lignans and Coumarins	Coumarins	524-30-1	1.09491	2.62688	1.39335	up
Smgp004575	C21H20O12	Quercetin-5-O-β-D-glucoside	Flavonoids	Flavonols	-	1.24764	0.495872	-1.01196	down		Zmyn004732	C18H30O3	2R-hydroxy-9Z,12Z,15Z-octadecatrienoic acid	Lipids	Free fatty acids	-	1.23462	2.61921	1.38913	up		pme2746	C27H33N9O15P2	Riboflavin 5'-Adenosine Diphosphate	Nucleotides and derivatives	Nucleotides and derivatives	146-14-5	1.36941	2.25993	1.17628	up		Cmqp003383	C11H11NO3	Gentianamine	Alkaloids	Pyridine alkaloids	22952-54-1	1.12838	2.22694	1.15506	up
pmn001427	C30H48O4	16,23:16,30-Diepoxydammar-24-ene-3,20-diol (Jujubogenin)	Terpenoids	Triterpene	54815-36-0	1.2229	0.48932	-1.03115	down		Zmdn002400	C21H24O11	Epicatechin-3'-O-β-D-glucopyranoside	Flavonoids	Flavanols	-	1.22753	0.408828	-1.29043	down		Lmsn004162	C22H22O12	1-O-Galloyl-2-O-p-Coumaroyl-β-D-glucose	Phenolic acids	Phenolic acids	94356-18-0	1.37551	0.00182221	-9.10009	down		MA10039492	C6H6O6	Dehydroascorbic acid	Others	Vitamin	490-83-5	1.38728	3.0527e-05	-14.9996	down
mws0574	C4H8O3	2-Hydroxyisobutyric acid	Organic acids	Organic acids	594-61-6	1.19579	0.412105	-1.27892	down		Zmjp000182	C7H16N4O2	N-Monomethyl-L-arginine	Amino acids and derivatives	Amino acids and derivatives	17035-90-4	1.25664	7.10227	2.82828	up		Lmmp002904	C26H28O17	Gossypetin-3-O-glucoside-8-O-xyloside	Flavonoids	Flavonols	-	1.37672	0.000195344	-12.3217	down		mws0206	C4H8O3	2-Hydroxybutyric Acid	Organic acids	Organic acids	3347-90-8	1.39021	0.000652979	-10.5807	down
Zmdn002400	C21H24O11	Epicatechin-3'-O-β-D-glucopyranoside	Flavonoids	Flavanols	-	1.23186	0.358537	-1.47981	down		pmp000263	C30H46O3	3-Hydroxyurs-12,19-dien-28-oic acid (Sanguisorbigenin)	Terpenoids	Triterpene	-	1.25675	0.000229308	-12.0904	down		pme2165	C5H4N2O4	Orotic acid (Vitamin B13)	Others	Vitamin	65-86-1	1.37828	8455.32	13.0456	up		Hmcp001858	C26H28O14	Kaempferol-3-O-arabinoside-7-O-rhamnoside	Flavonoids	Flavonols	-	1.16665	2.23351	1.15931	up
Zmjp000182	C7H16N4O2	N-Monomethyl-L-arginine	Amino acids and derivatives	Amino acids and derivatives	17035-90-4	1.24837	2.59262	1.37441	up		Smpn009230	C30H48O5	2,3,23-Trihydroxyolean-12-en-28-oic acid	Terpenoids	Triterpene	-	1.25662	0.296956	-1.75168	down		mws0028	C8H8O4	Vanillic acid	Phenolic acids	Phenolic acids	121-34-6	1.37829	28178	14.7823	up		Lmtp004044	C26H28O16	Quercetin-3-O-apiosyl(1→2)galactoside	Flavonoids	Flavonols	-	1.22838	2.23968	1.16329	up
pmp000263	C30H46O3	3-Hydroxyurs-12,19-dien-28-oic acid (Sanguisorbigenin)	Terpenoids	Triterpene	-	1.25858	0.000229308	-12.0904	down		Hmcp003223	C17H14O8	Limocitrin (5,7,4'-trihydroxy-8,3'-dimethoxyflavone)	Flavonoids	Flavonols	489-33-8	1.22447	5.36306	2.42306	up		MWSHY0019	C28H34O15	Hesperetin-7-O-neohesperidoside(Neohesperidin)	Flavonoids	Flavanones	13241-33-3	1.33422	14704.9	13.844	up		Qmyp010506	C13H10O4	2,4,6-Trihydroxybenzophenone	Others	Others	3555-86-0	1.32194	2.05138	1.03659	up
Smpn009230	C30H48O5	2,3,23-Trihydroxyolean-12-en-28-oic acid	Terpenoids	Triterpene	-	1.25728	0.261931	-1.93274	down		mws1361	C21H22O11	Taxifolin-3-O-rhamnoside (Astilbin)	Flavonoids	Flavanonols	29838-67-3	1.23139	2.17177	1.11887	up		MWSmce220	C6H10O6	D-Glucono-1,5-lactone	Others	Saccharides	90-80-2	1.37825	4.97962e-05	-14.2936	down		Lssp210058	C27H30O16	Quercetin-3-O-robinobioside	Flavonoids	Flavonols	52525-35-6	1.37697	0.337357	-1.56765	down
Hmcp003223	C17H14O8	Limocitrin (5,7,4'-trihydroxy-8,3'-dimethoxyflavone)	Flavonoids	Flavonols	489-33-8	1.23028	5.96245	2.57591	up		zjgp122004	C21H22O11	Okanin-3'-O-β-D-glucoside	Flavonoids	Chalcones	-	1.24976	0.45895	-1.12359	down		pmp000781	C39H54O6	p-Coumaroyleuscaphic acid	Terpenoids	Triterpene	-	1.37761	11815.6	13.5284	up		pmp001141	C25H31NO10	Cimicifugamide	Alkaloids	Phenolamine	-	1.26688	2.55844	1.35526	up
mws1361	C21H22O11	Taxifolin-3-O-rhamnoside (Astilbin)	Flavonoids	Flavanonols	29838-67-3	1.24912	3.5579	1.83103	up		HX1341	C9H6O3	7-hydroxy-2H-1-benzopyran-2-one	Lignans and Coumarins	Coumarins	-	1.24828	0.220789	-2.17926	down		mws0982	C6H11N3	1-Methylhistamine	Alkaloids	Alkaloids	501-75-7	1.3766	0.000290326	-11.75	down		HJAP154	C23H16O11	Galloylisorhamnetin	Flavonoids	Flavonols	-	1.3873	1482.04	10.5334	up
zjgp122004	C21H22O11	Okanin-3'-O-β-D-glucoside	Flavonoids	Chalcones	-	1.25732	0.403097	-1.3108	down		NK10251888	C8H18N4O2	NG,NG-Dimethyl-L-arginine	Amino acids and derivatives	Amino acids and derivatives	30315-93-6	1.25423	3.81344	1.93109	up		Hmln000297	C6H12O6	Inositol	Others	Saccharides	87-89-8	1.34532	2.37522	1.24806	up		Lmmp003306	C25H26O15	Quercetin-3-O-xylosyl(1→2)arabinoside	Flavonoids	Flavonols	-	1.38818	0.0010151	-9.94416	down
HX1341	C9H6O3	7-hydroxy-2H-1-benzopyran-2-one	Lignans and Coumarins	Coumarins	-	1.25286	0.192486	-2.37718	down		Lmsn006839	C36H58O12	2,3,19,23,24-Pentahydroxyolean-12-en-28-oic acid-28-O-glucoside	Terpenoids	Triterpene Saponin	-	1.25436	0.45759	-1.12787	down		Lmbp102601	C9H6O3	7-Hydroxycoumarin;Umbelliferone	Lignans and Coumarins	Coumarins	93-35-6	1.37812	0.000111277	-13.1336	down		pme2589	C6H8O5	2-Oxoadipic acid	Organic acids	Organic acids	3184-35-8	1.21859	2.22816	1.15585	up
Lmsn006839	C36H58O12	2,3,19,23,24-Pentahydroxyolean-12-en-28-oic acid-28-O-glucoside	Terpenoids	Triterpene Saponin	-	1.25733	0.394174	-1.34309	down		Lmxp001668	C9H10O2	2-Methoxy-4-ethenylphenol	Phenolic acids	Phenolic acids	7786-61-0	1.25105	0.367239	-1.44521	down		pmp000695	C16H22O10	Swertiamarin	Terpenoids	Monoterpenoids	17388-39-5	1.04563	2.05018	1.03575	up		pmf0400	C22H44O2	Docosanoic acid (Behenic acid)	Lipids	Free fatty acids	112-85-6	1.38631	36617.9	15.1603	up
Lmxp001668	C9H10O2	2-Methoxy-4-ethenylphenol	Phenolic acids	Phenolic acids	7786-61-0	1.23518	0.425418	-1.23305	down		Yshs000049	C30H46O4	6-Hydroxy-lupane-20(29)-en-3-one-28-oic acid	Terpenoids	Triterpene	-	1.23152	2.10156	1.07146	up		Wmqn000814	C16H16O10	6,7-Dihydroxycoumarin-7-O-(6'-acetyl)glucoside	Lignans and Coumarins	Coumarins	-	1.05675	2.21918	1.15003	up
Lssp210056	C21H20O12	Quercetin3-O-galactoside	Flavonoids	Other Flavonoids	-	1.25198	0.478273	-1.06409	down		Lssp210056	C21H20O12	Quercetin3-O-galactoside	Flavonoids	Other Flavonoids	-	1.25662	0.438253	-1.19017	down		MWSmce697	C8H10O2	4-Ethoxyphenol	Phenolic acids	Phenolic acids	622-62-8	1.37821	1699.02	10.7305	up
pmb3056	C16H20O9	Homovanilloylquinic acid	Phenolic acids	Phenolic acids	-	1.25412	0.204674	-2.2886	down		pmb3056	C16H20O9	Homovanilloylquinic acid	Phenolic acids	Phenolic acids	-	1.25575	0.170499	-2.55217	down		MWS4525	C6H7N5O	6-O-methylguanine	Nucleotides and derivatives	Nucleotides and derivatives	20535-83-5	1.3782	0.000196168	-12.3156	down
MWSmce588	C16H14O5	Licochalcone B	Flavonoids	Chalcones	58749-23-8	1.2592	34324.1	15.0669	up		MWSmce588	C16H14O5	Licochalcone B	Flavonoids	Chalcones	58749-23-8	1.25745	41580.6	15.3436	up		Lmsn004090	C22H22O12	1-O-Galloyl-3-O-p-Coumaroyl-β-D-glucose	Phenolic acids	Phenolic acids	-	1.03613	4.56836	2.19168	up
Lmtn003032	C14H17NO6	Sambunigrin	Alkaloids	Alkaloids	99-19-4	1.23741	0.00192998	-9.0172	down		Zjmp102712	C30H46O4	2,3-Dihydroxylup-20(29)-en-28-oic acid	Terpenoids	Triterpene	-	1.25416	0.339738	-1.5575	down		pmc0066	C10H13N4O7P	2'-Deoxyinosine-5'-monophosphate	Nucleotides and derivatives	Nucleotides and derivatives	3393-18-8	1.37043	0.144668	-2.78918	down
Zjmp102712	C30H46O4	2,3-Dihydroxylup-20(29)-en-28-oic acid	Terpenoids	Triterpene	-	1.25746	0.344705	-1.53657	down		mws1038	C11H22N2O4S	Pantetheine	Alkaloids	Alkaloids	496-65-1	1.25742	1288.47	10.3314	up		Hmcp002123	C10H8O4	Isoscopoletin (6-Hydroxy-7-Methoxycoumarin)	Lignans and Coumarins	Coumarins	776-86-3	1.34685	2.82709	1.49932	up
Lmsn011015	C30H46O5	1-Oxo-Siaresinolic acid	Terpenoids	Triterpene	-	1.22913	0.302959	-1.72281	down		MWSHY0051	C15H10O6	Kaempferol (3,5,7,4'-Tetrahydroxyflavone)	Flavonoids	Flavonols	520-18-3	1.25081	0.378335	-1.40226	down		mws4170	C6H12O6	D-Glucose	Others	Saccharides	50-99-7	1.3386	2.55759	1.35478	up
mws1038	C11H22N2O4S	Pantetheine	Alkaloids	Alkaloids	496-65-1	1.25859	1462.19	10.5139	up		Zasp102439	C8H7N	m-Aminophenylacetylene	Alkaloids	Alkaloids	54060-30-9	1.10115	0.28549	-1.80849	down		zjmp120215	C30H46O4	3,25-Epoxy-3-hydroxyurs-12-en-28-oic acid (Lantic acid)	Terpenoids	Triterpene	-	1.37654	0.000947693	-10.0433	down
Zasp102439	C8H7N	m-Aminophenylacetylene	Alkaloids	Alkaloids	54060-30-9	1.11914	0.342276	-1.54677	down		Hmhn007023	C30H48O6	2,3,19-Trihydroxyurs-12-en-28-oic acid	Terpenoids	Triterpene	-	1.25679	0.194837	-2.35966	down		Lmhn003799	C24H22O12	Feruloylferuloyltartaric acid	Phenolic acids	Phenolic acids	-	1.3086	3.91509	1.96904	up
Hmhn007023	C30H48O6	2,3,19-Trihydroxyurs-12-en-28-oic acid	Terpenoids	Triterpene	-	1.25796	0.179152	-2.48074	down		Cmbn007148	C22H22O9	1-O-Feruloyl-3-O-caffeoylglycerol	Phenolic acids	Phenolic acids	-	1.25545	0.100043	-3.32131	down		pmb0752	C17H20O9	3-O-Feruloylquinic acid	Phenolic acids	Phenolic acids	1899-29-2	1.37627	0.000367921	-11.4083	down
Lmsn012627	C30H46O4	2,3-Dihydroxyurs-12,18-dien-28-oic acid	Terpenoids	Triterpene	-	1.22666	0.487444	-1.03669	down		mws0282	C11H12N2O2	L-Tryptophan	Amino acids and derivatives	Amino acids and derivatives	73-22-3	1.25706	0.203136	-2.29948	down		Lmhp008513	C33H56O14	2-α-Linolenoyl-glycerol-1,3-di-O-glucoside	Lipids	Glycerol ester	-	1.21765	0.366728	-1.44722	down
Cmbn007148	C22H22O9	1-O-Feruloyl-3-O-caffeoylglycerol	Phenolic acids	Phenolic acids	-	1.25116	0.199111	-2.32836	down		mws0097	C20H22O6	Pinoresinol	Lignans and Coumarins	Lignans	487-36-5	1.24335	2.08226	1.05815	up		mws1478	C10H14N2	Nicotine	Alkaloids	Pyridine alkaloids	54-11-5	1.23566	0.445848	-1.16538	down
mws0282	C11H12N2O2	L-Tryptophan	Amino acids and derivatives	Amino acids and derivatives	73-22-3	1.25695	0.246365	-2.02113	down		Zblp002839	C9H10O3	3-(3-Hydroxyphenyl)-propionic acid	Phenolic acids	Phenolic acids	621-54-5	1.24115	0.369118	-1.43785	down		MWS20151	C15H10O5	Apigenin; 4',5,7-Trihydroxyflavone	Flavonoids	Flavones	520-36-5	1.37674	503.133	8.9748	up
pmb0803	C24H29NO11	Pyridoxine-5'-O-(6''-feruloyl)glucoside	Others	Vitamin	-	1.0548	0.493643	-1.01846	down		MWSmce024	C16H18O9	Scopoletin-7-O-glucoside (Scopolin)	Lignans and Coumarins	Coumarins	531-44-2	1.25736	15155.9	13.8876	up		MWS0502	C3H7NO2	β-Alanine	Amino acids and derivatives	Amino acids and derivatives	107-95-9	1.37451	5317.44	12.3765	up
mws0097	C20H22O6	Pinoresinol	Lignans and Coumarins	Lignans	487-36-5	1.25624	3.65068	1.86817	up		Lmmp002080	C11H16N2O	N-(4-Aminobutyl)benzamide	Alkaloids	Alkaloids	5692-23-9	1.12405	0.498783	-1.00352	down		mws1589	C18H32O16	D-Panose	Others	Saccharides	33401-87-5	1.24955	0.404973	-1.3041	down
Zblp002839	C9H10O3	3-(3-Hydroxyphenyl)-propionic acid	Phenolic acids	Phenolic acids	621-54-5	1.25777	0.347949	-1.52305	down		pme2596	C8H9NO4	4-Pyridoxic acid	Others	Vitamin	82-82-6	1.25642	0.456277	-1.13202	down		Ymjm000142	C17H20O9	5-O-Caffeoylquinic acid methyl ester	Phenolic acids	Phenolic acids	-	1.34241	2.44643	1.29068	up
MWSmce024	C16H18O9	Scopoletin-7-O-glucoside (Scopolin)	Lignans and Coumarins	Coumarins	531-44-2	1.25912	20086.6	14.2939	up		pme3096	C3H5NO4	Aminomalonic acid	Organic acids	Organic acids	1068-84-4	1.0602	2.67571	1.41992	up		Ymjm000141	C17H20O9	4-O-Caffeoylquinic acid methyl ester	Phenolic acids	Phenolic acids	123372-74-7	1.34241	2.44643	1.29068	up
MWS1912	C13H22O3	Methyl dihydrojasmonate	Organic acids	Organic acids	24851-98-7	1.25791	896.503	9.80817	up		Lmsn012480	C30H44O5	2,19-Dihydroxy-3-oxoursa-1,12-dien-28-oic acid (Fupenzic acid)	Terpenoids	Triterpene	119725-20-1	1.25537	0.308725	-1.69561	down		Lmgn003073	C17H20O9	5-O-Feruloylquinic acid	Phenolic acids	Phenolic acids	-	1.09191	0.384741	-1.37804	down
pme2596	C8H9NO4	4-Pyridoxic acid	Others	Vitamin	82-82-6	1.25731	0.431711	-1.21186	down		mws0913	C21H20O11	Kaempferol-3-O-galactoside (Trifolin)	Flavonoids	Flavonols	23627-87-4	1.02162	0.298704	-1.74321	down		pme2776	C10H12N4O4	2'-Deoxyinosine	Nucleotides and derivatives	Nucleotides and derivatives	890-38-0	1.3561	0.476806	-1.06853	down
Lmyp004022	C28H24O15	Kaempferol-3-O-(2''-galloyl)glucoside	Flavonoids	Flavonols	76343-90-3	1.2584	0.00055832	-10.8066	down		pmp001054	C17H24O11	Gardenoside	Terpenoids	Monoterpenoids	24512-62-7	1.24125	0.410951	-1.28296	down		Zmxn004201	C36H58O10	Rosamultin	Terpenoids	Triterpene Saponin	88515-58-6	1.2204	2.11845	1.08301	up
pme3096	C3H5NO4	Aminomalonic acid	Organic acids	Organic acids	1068-84-4	1.23896	2.17524	1.12118	up		Wbmn009702	C30H48O5	2,3,23-Trihydroxyurs-12-en-28-oic acid	Terpenoids	Triterpene	-	1.25446	0.281473	-1.82893	down		mad2394	C24H22O12	Sinapoyl-p-coumaroyltartaric acid	Phenolic acids	Phenolic acids	-	1.14705	2.99229	1.58125	up
Lmsn012480	C30H44O5	2,19-Dihydroxy-3-oxoursa-1,12-dien-28-oic acid (Fupenzic acid)	Terpenoids	Triterpene	119725-20-1	1.25646	0.3907	-1.35587	down		Jmgn004021	C21H22O11	6-C-Glucosyl-2-Hydroxynaringenin	Flavonoids	Flavanones	-	1.25425	0.433605	-1.20555	down		MWSmce016	C7H7NO2	Nicotinic Acid Methyl Ester(Methyl Nicotinate)	Alkaloids	Pyridine alkaloids	93-60-7	1.26444	0.323659	-1.62746	down
pmp001054	C17H24O11	Gardenoside	Terpenoids	Monoterpenoids	24512-62-7	1.25451	0.370459	-1.43262	down		pmb0818	C11H11NO3	Methoxyindoleacetic acid	Alkaloids	Plumerane	3471-31-6	1.25598	0.190607	-2.39133	down		Lmtp004126	C24H22O16	Myricetin-3-O-(6''-malony)glucoside	Flavonoids	Flavonols	-	1.37455	618.718	9.27314	up
Wbmn009702	C30H48O5	2,3,23-Trihydroxyurs-12-en-28-oic acid	Terpenoids	Triterpene	-	1.25925	0.244518	-2.03199	down		pme0243	C5H8O4	Glutaric acid	Organic acids	Organic acids	110-94-1	1.25449	31450.5	14.9408	up		Zmsp00487	C4H6N4O3	Allantoin	Organic acids	Organic acids	97-59-6	1.14853	0.25302	-1.98268	down
pmb0818	C11H11NO3	Methoxyindoleacetic acid	Alkaloids	Plumerane	3471-31-6	1.25749	0.205859	-2.28027	down		Jmzn006005	C10H10O3	3,4-Methylenedioxy cinnamyl alcohol	Lignans and Coumarins	Lignans	58095-76-4	1.25008	2.03696	1.02641	up		MWSmce577	C12H14O3	(E)-Ethyl p-methoxycinnamate	Phenolic acids	Phenolic acids	24393-56-4	1.37772	0.000273696	-11.8351	down
Zmdn004824	C46H58O25	Oleoacteoside	Phenolic acids	Phenolic acids	111116-28-0	1.16755	0.33326	-1.58528	down		Wbtp004753	C15H10O7	1,2,3,7,8-pentahydroxy-6-methylanthracene-9,10-dione	Flavonoids	Other Flavonoids	-	1.14266	0.298534	-1.74403	down		Cmqp003383	C11H11NO3	Gentianamine	Alkaloids	Pyridine alkaloids	22952-54-1	1.2824	2.15583	1.10825	up
pmp000585	C24H22O13	Apigenin-7-O-(6''-malonyl)glucoside	Flavonoids	Flavones	86546-87-4	1.2542	358.531	8.48595	up		pmb2657	C10H18N4O6	Argininosuccinic acid	Organic acids	Organic acids	2387-71-5	1.24441	3.25636	1.70326	up		MA10039492	C6H6O6	Dehydroascorbic acid	Others	Vitamin	490-83-5	1.37446	3.0527e-05	-14.9996	down
pme3186	C3H7O6P	DL-Glyceraldehyde-3-phosphate	Organic acids	Organic acids	591-59-3	1.20339	2.23637	1.16116	up		Zmdp000292	C7H16N4O2	Arginine methyl ester	Amino acids and derivatives	Amino acids and derivatives	-	1.25663	7.45231	2.89769	up		pme2828	C6H5NO3	4-Nitrophenol	Phenolic acids	Phenolic acids	100-02-7	1.30775	0.310408	-1.68776	down
Wbtp004753	C15H10O7	1,2,3,7,8-pentahydroxy-6-methylanthracene-9,10-dione	Flavonoids	Other Flavonoids	-	1.15145	0.288919	-1.79126	down		MWS5083	C17H21N4O9P	Flavin Single Nucleotide(FMN)	Nucleotides and derivatives	Nucleotides and derivatives	6184-17-4	1.25092	2.45491	1.29567	up		Hmcp001858	C26H28O14	Kaempferol-3-O-arabinoside-7-O-rhamnoside	Flavonoids	Flavonols	-	1.15836	0.478672	-1.06289	down
Zmdp000292	C7H16N4O2	Arginine methyl ester	Amino acids and derivatives	Amino acids and derivatives	-	1.25211	2.48603	1.31384	up		pmb0789	C14H21NO8	Pyridoxine-5'-O-glucoside	Others	Vitamin	-	1.24075	0.494527	-1.01588	down		Lmtp004044	C26H28O16	Quercetin-3-O-apiosyl(1→2)galactoside	Flavonoids	Flavonols	-	1.1748	2.83577	1.50374	up
pmb0789	C14H21NO8	Pyridoxine-5'-O-glucoside	Others	Vitamin	-	1.24472	0.489844	-1.02961	down		pmb1096	C8H7N	Indole	Alkaloids	Plumerane	120-72-9	1.25335	0.33122	-1.59414	down		Zahp003766	C26H28O16	Quercetin 3-O-glucoside 7-O-xyloside	Flavonoids	Flavonols	-	1.16561	2.8359	1.50381	up
pme0264	C10H14N2O5	Thymidine	Nucleotides and derivatives	Nucleotides and derivatives	50-89-5	1.23702	2.09627	1.06782	up		pmb3066	C22H26O12	5-O-p-Coumaroylshikimic acid O-glucoside	Phenolic acids	Phenolic acids	-	1.25257	0.136726	-2.87064	down		Lmmp003306	C25H26O15	Quercetin-3-O-xylosyl(1→2)arabinoside	Flavonoids	Flavonols	-	1.37563	0.0010151	-9.94416	down
Zmgn000447	C3H7O7P	3-Phospho-D-glyceric acid	Others	Saccharides	820-11-1	1.24932	2.10634	1.07474	up		Hmlp003068	C27H30O17	Meratin	Flavonoids	Flavones	27215-04-9	1.25651	0.128165	-2.96393	down		HJN049	C30H24O12	2α,3α-Epoxy-5,7,3',4'-tetrahydroxyflavan-(4β-8-catechin)	Tannins	Proanthocyanidins	-	1.33881	0.461329	-1.11613	down
pmb1096	C8H7N	Indole	Alkaloids	Plumerane	120-72-9	1.25673	0.345545	-1.53305	down		Lmqp013299	C30H48O3	3-Hydroxyurs-12-en-24-oic acid (β-Boswellic acid)	Terpenoids	Triterpene	631-69-6	1.23999	3.18317	1.67046	up
pmb3066	C22H26O12	5-O-p-Coumaroylshikimic acid O-glucoside	Phenolic acids	Phenolic acids	-	1.25126	0.107907	-3.21215	down		mws1090	C6H13O9P	Glucose-1-phosphate	Others	Saccharides	59-56-3	1.2462	2.90285	1.53747	up
Hmlp003068	C27H30O17	Meratin	Flavonoids	Flavones	27215-04-9	1.25833	0.148065	-2.75569	down		Zmxn110201	C14H20O9	2,6-Dimethoxy-4-hydroxyphenol-1-O-ß-D-glucopyranoside	Others	Others	-	1.25214	0.437069	-1.19407	down
Lmqp013299	C30H48O3	3-Hydroxyurs-12-en-24-oic acid (β-Boswellic acid)	Terpenoids	Triterpene	631-69-6	1.14059	3.25513	1.70272	up		pmb0981	C10H14N5O7P	Adenosine 5'-monophosphate	Nucleotides and derivatives	Nucleotides and derivatives	61-19-8	1.25148	3.53589	1.82207	up
mws1090	C6H13O9P	Glucose-1-phosphate	Others	Saccharides	59-56-3	1.25902	2.90584	1.53896	up		Lmbp002962	C10H8O5	Isofraxetin	Lignans and Coumarins	Coumarins	50656-75-2	1.239	1914.49	10.9027	up
mws0369	C20H32O2	Arachidonic Acid	Lipids	Free fatty acids	506-32-1	1.25914	0.000390034	-11.3241	down		MWSHY0113	C21H20O12	Quercetin-3-O-galactoside (Hyperin)	Flavonoids	Flavonols	482-36-0	1.24809	0.456085	-1.13263	down
Zmxn110201	C14H20O9	2,6-Dimethoxy-4-hydroxyphenol-1-O-ß-D-glucopyranoside	Others	Others	-	1.25711	0.435919	-1.19787	down		mws0736	C8H16N2O3	N-Glycyl-L-leucine	Amino acids and derivatives	Amino acids and derivatives	869-19-2	1.15666	2.13603	1.09493	up
pmb0981	C10H14N5O7P	Adenosine 5'-monophosphate	Nucleotides and derivatives	Nucleotides and derivatives	61-19-8	1.24945	2.55219	1.35173	up		mws1002	C17H14O8	Syringetin	Flavonoids	Flavonols	4423-37-4	1.22246	4.14628	2.05182	up
Lmtn003441	C15H20O7	2-Acetyl-3-hydroxyphenyl-1-O-glucoside	Phenolic acids	Phenolic acids	-	1.04629	0.400205	-1.32119	down		Zblp004976	C17H18O5	2,4'-Dihydroxy-4,6-dimethoxydihydrochalcone	Flavonoids	Chalcones	151752-07-7	1.2045	0.412856	-1.27629	down
Lmbp002962	C10H8O5	Isofraxetin	Lignans and Coumarins	Coumarins	50656-75-2	1.2586	1125.27	10.1361	up		Lmyp003371	C7H8O2	3,5-Dihydroxytoluene	Phenolic acids	Phenolic acids	504-15-4	1.25695	2543.07	11.3124	up
MWSHY0113	C21H20O12	Quercetin-3-O-galactoside (Hyperin)	Flavonoids	Flavonols	482-36-0	1.24684	0.494543	-1.01583	down		Lmdn004267	C20H22O6	Epipinoresinol	Lignans and Coumarins	Lignans	24404-50-0	1.25269	2.02509	1.01798	up
mws0736	C8H16N2O3	N-Glycyl-L-leucine	Amino acids and derivatives	Amino acids and derivatives	869-19-2	1.18662	2.08639	1.06101	up		pmb0382	C19H14O6	O-Feruloyl 4-hydroxycoumarin	Lignans and Coumarins	Coumarins	-	1.22756	2.02561	1.01836	up
mws4134	C20H32N6O12S2	Oxiglutatione	Amino acids and derivatives	Amino acids and derivatives	27025-41-8	1.25018	2.50707	1.326	up		mws4176	C12H16N2O3	L-Alanyl-L-Phenylalanine	Amino acids and derivatives	Amino acids and derivatives	3061-90-3	1.25433	0.000497865	-10.972	down
pmb0819	C10H8N2	3-Indoleacetonitrile	Alkaloids	Plumerane	771-51-7	1.22372	0.246006	-2.02323	down		Lmjp003231	C22H22O13	Patuletin-3-O-glucoside	Flavonoids	Flavonols	-	1.21512	0.185422	-2.43112	down
mws1002	C17H14O8	Syringetin	Flavonoids	Flavonols	4423-37-4	1.25157	5.33592	2.41574	up		pmn001375	C26H32O12	1-Hydroxypinoresinol-1-O-Glucoside	Lignans and Coumarins	Lignans	81495-71-8	1.25399	0.450962	-1.14892	down
Lmdn004267	C20H22O6	Epipinoresinol	Lignans and Coumarins	Lignans	24404-50-0	1.25719	3.85479	1.94665	up		Lmdn001560	C15H22O9	6-DeoxyCatalpol	Terpenoids	Monoterpenoids	99499-99-7	1.25727	7159.16	12.8056	up
Lskp211459	C30H46O2	Olean-12-ene-3,16-dione (Maniladione)	Terpenoids	Triterpene	-	1.14704	0.441681	-1.17892	down		HJN104	C21H22O13	Dihydromyricetin-3-O-glucoside	Flavonoids	Flavanonols	-	1.22224	0.20891	-2.25905	down
mws4176	C12H16N2O3	L-Alanyl-L-Phenylalanine	Amino acids and derivatives	Amino acids and derivatives	3061-90-3	1.25604	0.000497865	-10.972	down		pmn001591	C30H48O5	3,19,23-Trihydroxyurs-12-en-28-oic acid (Rutundic acid)	Terpenoids	Triterpene	20137-37-5	1.25431	8.59545e-06	-16.828	down
Lmjp003231	C22H22O13	Patuletin-3-O-glucoside	Flavonoids	Flavonols	-	1.2151	0.2196	-2.18705	down		pme1286	C14H20N6O5S	S-(5'-Adenosy)-L-homocysteine	Amino acids and derivatives	Amino acids and derivatives	979-92-0	1.20343	3.26804	1.70843	up
pmn001375	C26H32O12	1-Hydroxypinoresinol-1-O-Glucoside	Lignans and Coumarins	Lignans	81495-71-8	1.25274	0.423107	-1.24091	down		mws0049	C15H14O7	Gallocatechin	Flavonoids	Flavanols	970-73-0	1.25734	6286.75	12.6181	up
Lmdn001560	C15H22O9	6-DeoxyCatalpol	Terpenoids	Monoterpenoids	99499-99-7	1.25916	9221.74	13.1708	up		Zmhp005139	C25H24O15	Tamarixetin-3-O-(6''-malonyl)glucoside	Flavonoids	Flavonols	-	1.22699	2.08949	1.06315	up
HJN104	C21H22O13	Dihydromyricetin-3-O-glucoside	Flavonoids	Flavanonols	-	1.23752	0.12172	-3.03837	down		Lmhp010515	C25H52NO7P	LysoPC 17:0(2n isomer)	Lipids	LPC	-	1.25723	1585.45	10.6307	up
pmn001591	C30H48O5	3,19,23-Trihydroxyurs-12-en-28-oic acid (Rutundic acid)	Terpenoids	Triterpene	20137-37-5	1.01282	0.222551	-2.16779	down		Lmyp005841	C21H20O9	Chrysin-7-O-glucoside	Flavonoids	Flavones	31025-53-3	1.2431	0.434183	-1.20363	down
pme3227	C27H30O14	Vitexin-2''-O-rhamnoside	Flavonoids	Flavones	64820-99-1	1.05221	0.406316	-1.29932	down		YC512112	C16H24O5N2	Anabasine-glucoside	Alkaloids	Pyridine alkaloids	-	1.25574	0.123613	-3.0161	down
pme1286	C14H20N6O5S	S-(5'-Adenosy)-L-homocysteine	Amino acids and derivatives	Amino acids and derivatives	979-92-0	1.21865	3.16596	1.66264	up		Lmyp004318	C30H26O13	Kaempferol-3-O-(6''-p-Coumaroyl)galactoside	Flavonoids	Flavonols	-	1.24556	2.19881	1.13672	up
mws0049	C15H14O7	Gallocatechin	Flavonoids	Flavanols	970-73-0	1.25853	7387.55	12.8509	up		Zmln000899	C15H20O9	Syringaldehyde-4-O-glucoside	Phenolic acids	Phenolic acids	-	1.21895	0.480153	-1.05843	down
pmp000262	C29H44O	3-Hydroxy-28-norurs-17,19,21-trien	Terpenoids	Triterpene	-	1.067	0.480107	-1.05857	down		Lmsn010604	C30H46O6	2,3,19-Trihydroxyurs-12-en-23-formyl-28-oic Acid	Terpenoids	Triterpene	-	1.23676	0.142135	-2.81467	down
YC512112	C16H24O5N2	Anabasine-glucoside	Alkaloids	Pyridine alkaloids	-	1.25882	0.181473	-2.46217	down		MWS2442	C6H13O9P	D-Fructose 6-Phosphate	Others	Saccharides	643-13-0	1.25403	2.94401	1.55778	up
MWS2442	C6H13O9P	D-Fructose 6-Phosphate	Others	Saccharides	643-13-0	1.25806	3.29798	1.72158	up		pme3207	C6H6O4	Muconic acid	Organic acids	Organic acids	1119-72-8	1.19233	0.409129	-1.28937	down
pmn001553	C14H20O8	Cimidahurinine	Phenolic acids	Phenolic acids	142542-89-0	1.25823	0.415812	-1.266	down		YC512118	C18H35NO	Oleamide (9-Octadecenamide)	Lipids	Free fatty acids	301-02-0	1.23171	2.85602	1.51401	up
Zbsp003145	C15H14O6	Leucopelargonidin; 3,4,5,7,4'-Pentahydroxyflavan	Others	Others	520-17-2	1.25299	2.37283	1.24661	up		mws1200	C10H10O3	Trans-4-Hydroxycinnamic Acid Methyl Ester	Phenolic acids	Phenolic acids	19367-38-5	1.24329	2.0974	1.0686	up
Lmyp004407	C30H26O13	Kaempferol-3-O-(2''-p-Coumaroyl)galactoside	Flavonoids	Flavonols	-	1.25156	0.33175	-1.59183	down		Lmyp004407	C30H26O13	Kaempferol-3-O-(2''-p-Coumaroyl)galactoside	Flavonoids	Flavonols	-	1.2491	0.345809	-1.53195	down
pme0220	C13H20O3	Methyl jasmonate	Organic acids	Organic acids	1211-29-6	1.25767	3777.74	11.8833	up		MWSslk030	C28H36O15	Neohesperidin Dihydrochalcone (Nhdc)	Flavonoids	Chalcones	20702-77-6	1.23875	0.47194	-1.08332	down
Lmrj002793	C14H16N2O4	Cyclo(Phe-Glu)	Amino acids and derivatives	Amino acids and derivatives	-	1.02309	0.352961	-1.50242	down		pme0220	C13H20O3	Methyl jasmonate	Organic acids	Organic acids	1211-29-6	1.25698	2615.9	11.3531	up
pmp000596	C27H30O17	Quercetin-3-O-(2''-O-galactosyl)glucoside	Flavonoids	Flavonols	56782-99-1	1.24606	0.238634	-2.06713	down		mws1198	C10H12O3	Methyl 3-(4-hydroxyphenyl)propionate	Phenolic acids	Phenolic acids	5597-50-2	1.2039	2.22969	1.15684	up
Li512111	C24H24O13	Isorhamnetin-3-O-(6''-acetylglucoside)	Flavonoids	Flavonols	-	1.13832	2.30111	1.20233	up		pmp000596	C27H30O17	Quercetin-3-O-(2''-O-galactosyl)glucoside	Flavonoids	Flavonols	56782-99-1	1.23602	0.308209	-1.69802	down
Hmmn002544	C16H20O9	Ferulic acid-4-O-glucoside	Phenolic acids	Phenolic acids	117405-51-3	1.25922	148581	17.1809	up		Lmmn004625	C21H22O11	Dihydrokaempferol-7-O-glucoside	Flavonoids	Flavanonols	-	1.22735	0.402843	-1.31171	down
pmp000269	C30H48O5	2,3,19-Trihydroxyolean-12-en-28-oic acid (Arjunic acid)	Terpenoids	Triterpene	31298-06-3	1.20827	0.380855	-1.39269	down		Hmmn002544	C16H20O9	Ferulic acid-4-O-glucoside	Phenolic acids	Phenolic acids	117405-51-3	1.25743	173771	17.4068	up
Lmtp003948	C22H24O12	3',5',5,7-Tetrahydroxy-4'-methoxyflavanone-3'-O-glucoside	Flavonoids	Flavones	-	1.2489	0.033031	-4.92004	down		Lmtp003948	C22H24O12	3',5',5,7-Tetrahydroxy-4'-methoxyflavanone-3'-O-glucoside	Flavonoids	Flavones	-	1.2457	0.100038	-3.32138	down
HX1364	C16H18O9	isoscopoletin-glucoside	Lignans and Coumarins	Coumarins	-	1.25282	0.448558	-1.15663	down		Lmtn002324	C19H28O11	Benzyl-(2''-O-glucosyl)glucoside	Phenolic acids	Phenolic acids	-	1.22432	0.0790966	-3.66024	down
Lmtn002324	C19H28O11	Benzyl-(2''-O-glucosyl)glucoside	Phenolic acids	Phenolic acids	-	1.22402	0.056383	-4.1486	down		Wafn001957	C15H16O11	2-O-Caffeoylglucaric Acid	Phenolic acids	Phenolic acids	-	1.25353	2.26707	1.18083	up
Wagp004984	C24H26O14	Limocitrol 3-Glucoside	Flavonoids	Flavones	-	1.25238	0.298386	-1.74475	down		pmb3101	C7H12O5	2-Isopropylmalic Acid	Organic acids	Organic acids	49601-06-1	1.25694	5.6764	2.50498	up
mws0748	C16H18O9	1-Caffeoylquinic acid	Phenolic acids	Phenolic acids	1241-87-8	1.25925	2.76479e-06	-18.4644	down		mws0341	C6H12O3	2-Hydroxyisocaproic acid	Organic acids	Organic acids	20312-37-2	1.2561	22150.7	14.4351	up
pmp000251	C12H16O4	E-6,7-Dihydroxydihydroligustilide	Others	Lactones	-	1.25926	50070.4	15.6117	up		Wagp004984	C24H26O14	Limocitrol 3-Glucoside	Flavonoids	Flavones	-	1.24758	0.3743	-1.41773	down
Zmdn002353	C21H24O11	Epicatechin-6-C-β-D-glucopyranoside	Flavonoids	Flavanols	-	1.10536	0.345901	-1.53157	down		pmp000251	C12H16O4	E-6,7-Dihydroxydihydroligustilide	Others	Lactones	-	1.25257	48455.7	15.5644	up
Lmsp009971	C29H44O5	1,19-Dihydroxy-2-oxo-nor-A(3)-urs-12-en-28-oic acid (Rubuminatus B)	Terpenoids	Triterpene	-	1.04991	0.478257	-1.06414	down		Zmdn002353	C21H24O11	Epicatechin-6-C-β-D-glucopyranoside	Flavonoids	Flavanols	-	1.18756	0.31204	-1.6802	down
Lhwp110120	C30H48O5	2,3,19-Trihydroxyurs-12-en-28-oic acid (Hydroxypomolic Acid)	Terpenoids	Triterpene	119725-19-8	1.2531	0.281144	-1.83062	down		Lhwp110120	C30H48O5	2,3,19-Trihydroxyurs-12-en-28-oic acid (Hydroxypomolic Acid)	Terpenoids	Triterpene	119725-19-8	1.25746	0.000103347	-13.2402	down
pmb2928	C13H16O10	Gallic acid-4-O-glucoside	Phenolic acids	Phenolic acids	84274-52-2	1.2527	0.435247	-1.20009	down		pmb2928	C13H16O10	Gallic acid-4-O-glucoside	Phenolic acids	Phenolic acids	84274-52-2	1.25213	0.385051	-1.37688	down
mws0889	C4H8O5	D-Threonic Acid	Others	Saccharides	3909-12-4	1.24913	2.05063	1.03607	up		Lmgn000160	C4H8N2O3	3-Ureidopropionic Acid	Organic acids	Organic acids	462-88-4	1.22968	2.00002	1.00002	up
MWSmce035	C30H46O5	3,16-Dihydroxy-23-oxoolean-12-en-28-oic acid (Quillaic acid)	Terpenoids	Triterpene	631-01-6	1.25215	0.301361	-1.73043	down		Zmzp000145	C9H20N2O2	Trimethyllysine	Amino acids and derivatives	Amino acids and derivatives	23284-33-5	1.25274	3.75133	1.9074	up
Wafp002310	C15H20N2O5	1-O-Caffeoyllysine	Alkaloids	Phenolamine	-	1.25907	8122.3	12.9877	up		Zasn010433	C20H36O2	9,12-Octadecadienoic acid,ethyl ester	Others	Others	6114-21-2	1.10857	2.09794	1.06897	up
Lmbn002648	C9H8O3	α-Hydroxycinnamic Acid	Phenolic acids	Phenolic acids	5801-57-0	1.10454	4.08907	2.03177	up		Lmbn002648	C9H8O3	α-Hydroxycinnamic Acid	Phenolic acids	Phenolic acids	5801-57-0	1.08651	4.32221	2.11177	up
mws0983	C20H39NO2	N-Oleoylethanolamine	Alkaloids	Alkaloids	111-58-0	1.07973	2.4636	1.30077	up		Hmmp001310	C11H9NO2	3-Indoleacrylic acid	Alkaloids	Plumerane	1204-06-4	1.25338	0.193497	-2.36962	down
Hmmp001310	C11H9NO2	3-Indoleacrylic acid	Alkaloids	Plumerane	1204-06-4	1.25707	0.239762	-2.06032	down		Lmsn003297	C21H22O11	3,4,2',4',6'-Pentahydroxychalcone-4'-O-glucoside	Flavonoids	Chalcones	-	1.23483	0.491084	-1.02596	down
Cmyn001328	C15H16O9	Daphnin	Lignans and Coumarins	Coumarins	486-55-5	1.25913	0.00118852	-9.71662	down		Cmyn001328	C15H16O9	Daphnin	Lignans and Coumarins	Coumarins	486-55-5	1.18703	0.16786	-2.57467	down
MWSmce265	C14H14O4	Decursinol	Lignans and Coumarins	Coumarins	23458-02-8	1.25839	11617.1	13.504	up		Zajn002491	C21H24O11	catechin-4-β-D-galactopyranoside	Flavonoids	Flavanols	-	1.17588	0.249734	-2.00154	down
Zajn002491	C21H24O11	catechin-4-β-D-galactopyranoside	Flavonoids	Flavanols	-	1.0426	0.283166	-1.82028	down		pme3034	C5H8O4	Ethylmalonic acid	Organic acids	Organic acids	601-75-2	1.25563	4656.5	12.185	up
mws1060	C10H12N4O5	9-(Arabinosyl)hypoxanthine	Nucleotides and derivatives	Nucleotides and derivatives	7013-16-3	1.06959	3.10847	1.63621	up		Zmhn002647	C42H42O18	Emodin(10-10')emodin double monosaccharide glucosides	Quinones	Anthraquinone	-	1.25452	0.440934	-1.18136	down
pmb2855	C11H20N2O8	L-Glutamine-O-glycoside	Amino acids and derivatives	Amino acids and derivatives	-	1.11984	0.471476	-1.08474	down		mws1060	C10H12N4O5	9-(Arabinosyl)hypoxanthine	Nucleotides and derivatives	Nucleotides and derivatives	7013-16-3	1.02678	2.95236	1.56187	up
mws1430	C30H48O	Lup-20(29)-en-3-one (Lupenone)	Terpenoids	Triterpene	1617-70-5	1.25015	0.000173275	-12.4946	down		pmb2855	C11H20N2O8	L-Glutamine-O-glycoside	Amino acids and derivatives	Amino acids and derivatives	-	1.25697	0.000768441	-10.3458	down
Lmlp006175	C21H22O10	Isosalipurposide (Phlorizin Chalcone)	Flavonoids	Chalcones	4547-85-7	1.25926	2.76721e+06	21.4	up		Lmlp006175	C21H22O10	Isosalipurposide (Phlorizin Chalcone)	Flavonoids	Chalcones	4547-85-7	1.25744	1.0838e+06	20.0477	up
Lmsn010896	C30H46O6	23-Formyl-2,3,19-trihydroxyurs-12-en-28-oic acid (Pinfaensic acid)	Terpenoids	Triterpene	-	1.22739	0.286663	-1.80257	down		Lmqn001932	C28H36O13	Syringaresinol-4'-O-glucoside	Lignans and Coumarins	Lignans	7374-79-0	1.25743	5870.51	12.5193	up
pmb2922	C15H24N2O17P2	Uridine 5'-diphospho-D-glucose	Nucleotides and derivatives	Nucleotides and derivatives	133-89-1	1.24362	2.46876	1.30379	up		Lmyn003971	C26H34O11	Dihydrodehydrodiconiferyl alcohol-4-O-glucoside	Lignans and Coumarins	Lignans	-	1.17021	0.333326	-1.585	down
Hmhn003518	C16H20O9	4-O-β-D-glucopyranosylferulic acid	Phenolic acids	Phenolic acids	-	1.23584	3.47919	1.79875	up		Lmsn010896	C30H46O6	23-Formyl-2,3,19-trihydroxyurs-12-en-28-oic acid (Pinfaensic acid)	Terpenoids	Triterpene	-	1.25747	0.00146516	-9.41473	down
Hmgp002327	C11H9O2N	3-amino-2-naphthoic acid	Alkaloids	Alkaloids	-	1.25849	0.232748	-2.10316	down		MWStz191	C21H22O12	Taxifolin-3'-O-glucoside	Flavonoids	Flavanonols	31106-05-5	1.25525	0.464318	-1.10681	down
Hmdn006855	C30H48O3	3,4-Cycloopen-cycloaltin-4(29),25-diene-24(R)-hydroxy-3-carboxylic acid	Terpenoids	Triterpene	-	1.25869	7.52668e-05	-13.6976	down		Hmhn003518	C16H20O9	4-O-β-D-glucopyranosylferulic acid	Phenolic acids	Phenolic acids	-	1.2512	3.26695	1.70795	up
Lmsn007319	C37H34O16	Phloretin-4'-O-(6''-Galloyl)glucoside+p-Coumaroyl	Flavonoids	Chalcones	-	1.24418	2.06022	1.0428	up		Hmgp002327	C11H9O2N	3-amino-2-naphthoic acid	Alkaloids	Alkaloids	-	1.25572	0.189927	-2.39648	down
pme2527	C5H12N2O2	L-Ornithine	Amino acids and derivatives	Amino acids and derivatives	70-26-8	1.25919	6087.24	12.5716	up		Lmsn007319	C37H34O16	Phloretin-4'-O-(6''-Galloyl)glucoside+p-Coumaroyl	Flavonoids	Chalcones	-	1.25483	4.1801	2.06354	up
Zmpn002553	C15H16O9	Cichoriin	Lignans and Coumarins	Coumarins	531-58-8	1.25716	0.000921365	-10.0839	down		Zmgn001448	C7H12O5	2-Propylmalic Acid	Organic acids	Organic acids	-	1.25055	5.22402	2.38516	up
pmb2497	C9H10O5	4-Hydroxy-3-methoxymandelate	Phenolic acids	Phenolic acids	55-10-7	1.25893	0.00025962	-11.9113	down		Lmbn001754	C7H12O5	3-Isopropylmalic Acid	Organic acids	Organic acids	921-28-8	1.25055	5.22402	2.38516	up
pmn001421	C16H18O8	3-O-p-Coumaroylquinic acid	Phenolic acids	Phenolic acids	87099-71-6	1.23498	0.452308	-1.14462	down		pme2527	C5H12N2O2	L-Ornithine	Amino acids and derivatives	Amino acids and derivatives	70-26-8	1.25739	7185.22	12.8108	up
pmb3074	C16H18O8	5-O-p-Coumaroylquinic acid	Phenolic acids	Phenolic acids	1899-30-5	1.23498	0.452308	-1.14462	down		Zmpn002553	C15H16O9	Cichoriin	Lignans and Coumarins	Coumarins	531-58-8	1.08479	0.274831	-1.86338	down
Hamp011640	C16H33NO	palmitic amide	Others	Others	-	1.0016	0.385025	-1.37697	down		pme2954	C15H10O7	Quercetin	Flavonoids	Flavonols	117-39-5	1.23654	0.490357	-1.0281	down
Zmdp000972	C4H9NO2S	S-Methyl-L-cysteine	Amino acids and derivatives	Amino acids and derivatives	1187-84-4	1.25201	0.338177	-1.56415	down		Zmdp000972	C4H9NO2S	S-Methyl-L-cysteine	Amino acids and derivatives	Amino acids and derivatives	1187-84-4	1.25092	0.329352	-1.6023	down
mws1014	C10H8O5	Fraxetin (7,8-Dihydroxy-6-methoxycoumarin)	Lignans and Coumarins	Coumarins	574-84-5	1.19129	0.216581	-2.20702	down		Lmpn006208	C22H22O11	8-Methoxykaempferol-7-O-rhamnoside	Flavonoids	Flavonols	-	1.21493	0.288389	-1.79391	down
Lmpn006208	C22H22O11	8-Methoxykaempferol-7-O-rhamnoside	Flavonoids	Flavonols	-	1.23834	0.441916	-1.17815	down		mws1305	C12H11N5	6-Benzylaminopurine	Nucleotides and derivatives	Nucleotides and derivatives	1214-39-7	1.14057	3.34996	1.74414	up
mws1305	C12H11N5	6-Benzylaminopurine	Nucleotides and derivatives	Nucleotides and derivatives	1214-39-7	1.14469	3.53341	1.82106	up		Hmcn002743	C22H26O8	Lirioresinol A	Lignans and Coumarins	Lignans	-	1.25639	0.123082	-3.02231	down
Hmcn002743	C22H26O8	Lirioresinol A	Lignans and Coumarins	Lignans	-	1.25826	0.192256	-2.3789	down		HJAP155	C21H20O12	Laricitrin-3-O-xyloside	Flavonoids	Flavonols	-	1.24922	0.136299	-2.87515	down
Zjmp102703	C29H44O5	Norarjunolic acid	Terpenoids	Triterpene	60393-90-0	1.14233	0.31723	-1.6564	down		HJN090	C21H22O10	Butin-7-O-glucoside	Flavonoids	Flavanones	-	1.2401	2.19356	1.13328	up
HJAP155	C21H20O12	Laricitrin-3-O-xyloside	Flavonoids	Flavonols	-	1.24891	0.167834	-2.57489	down		mws2627	C16H12O7	Tamarixetin (3,3',5,7-Tetrahydroxy-4'-Methoxyflavone)	Flavonoids	Flavonols	603-61-2	1.23345	4.61273	2.20562	up
HJN090	C21H22O10	Butin-7-O-glucoside	Flavonoids	Flavanones	-	1.25246	4.42271	2.14493	up		Zmcp003989	C27H30O15	Kaempferol-3-O-rhamnosyl(1→2)glucoside	Flavonoids	Flavonols	-	1.24907	2.99338	1.58177	up
mws2627	C16H12O7	Tamarixetin (3,3',5,7-Tetrahydroxy-4'-Methoxyflavone)	Flavonoids	Flavonols	603-61-2	1.24533	4.556	2.18777	up		HJN003	C17H22O10	1-O-Sinapoyl-β-D-glucose	Phenolic acids	Phenolic acids	-	1.25172	0.278496	-1.84427	down
Zmdp001857	C14H18N2O6	γ-Glutamyltyrosine	Amino acids and derivatives	Amino acids and derivatives	7432-23-7	1.25906	0.000174136	-12.4875	down		Lssp210357	C30H40O14	Pierisoid B	Others	Saccharides	-	1.1208	0.0706953	-3.82224	down
HJN003	C17H22O10	1-O-Sinapoyl-β-D-glucose	Phenolic acids	Phenolic acids	-	1.23645	0.368965	-1.43845	down		Lssp210234	C33H42O12	13-de cinnamoyl-9-de acetyl Taxus Yunting B	Others	Others	-	1.13298	0.170882	-2.54893	down
Lssp210357	C30H40O14	Pierisoid B	Others	Saccharides	-	1.07852	0.105267	-3.24787	down		pmp001287	C8H9N	N-Benzylmethylene isomethylamine	Alkaloids	Alkaloids	-	1.25529	0.224027	-2.15825	down
Lssp210234	C33H42O12	13-de cinnamoyl-9-de acetyl Taxus Yunting B	Others	Others	-	1.00753	0.416002	-1.26534	down		Lmmp003767	C21H18O12	Kaempferol-7-O-glucuronide	Flavonoids	Flavonols	-	1.23785	6.65683	2.73483	up
pmp001287	C8H9N	N-Benzylmethylene isomethylamine	Alkaloids	Alkaloids	-	1.25598	0.330198	-1.5986	down		Lmmn002260	C27H36O12	5'-Methoxyisolariciresinol-9'-O-glucoside	Lignans and Coumarins	Lignans	-	1.25721	24514.9	14.5814	up
Lmmp003767	C21H18O12	Kaempferol-7-O-glucuronide	Flavonoids	Flavonols	-	1.25527	9.16204	3.19567	up		pmn001417	C24H20O9	Cinchonain Ic	Flavonoids	Flavanols	85081-22-7	1.24002	0.288656	-1.79258	down
Lmmn002260	C27H36O12	5'-Methoxyisolariciresinol-9'-O-glucoside	Lignans and Coumarins	Lignans	-	1.25785	34883.4	15.0903	up		Cmyp005062	C20H22O9	Salireposide	Phenolic acids	Phenolic acids	16955-55-8	1.06536	0.402463	-1.31307	down
pmn001417	C24H20O9	Cinchonain Ic	Flavonoids	Flavanols	85081-22-7	1.21275	0.281787	-1.82732	down		Lmtn004049	C15H20O4	Abscisic acid	Organic acids	Organic acids	21293-29-8	1.25366	4.22238	2.07806	up
Cmyp005062	C20H22O9	Salireposide	Phenolic acids	Phenolic acids	16955-55-8	1.22602	0.226363	-2.14329	down		mws0866	C6H13O9P	D-Glucose 6-phosphate	Others	Saccharides	56-73-5	1.25451	3.0703	1.61838	up
Lmtn004049	C15H20O4	Abscisic acid	Organic acids	Organic acids	21293-29-8	1.25255	3.25444	1.70241	up		pmb0532	C10H13N4O8P	Inosine 5'-monophosphate	Nucleotides and derivatives	Nucleotides and derivatives	131-99-7	1.25012	3.18257	1.67019	up
MWSCX013	C30H48O5	2,3,19-trihydroxyurs-12-en-28-oic acid (Euscaphic acid)	Terpenoids	Triterpene	53155-25-2	1.23631	0.356993	-1.48603	down		HJKP000649	C8H9NO	N-benzylformamide	Alkaloids	Alkaloids	6343-54-0	1.23652	0.330354	-1.59791	down
mws0866	C6H13O9P	D-Glucose 6-phosphate	Others	Saccharides	56-73-5	1.25814	3.23314	1.69293	up		Lahp003986	C21H22O10	3,4-Dihydro-4-(4'-hydroxyphenyl)-5,7-dihydroxycoumarin glucoside	Lignans and Coumarins	Coumarins	-	1.14883	2.01308	1.00941	up
mws0192	C4H6O4	Succinic acid	Organic acids	Organic acids	110-15-6	1.10507	2.6564	1.40947	up		Lskp211385	C20H20O6	(-)-dihydrosesamin	Lignans and Coumarins	Lignans	-	1.25112	7420.74	12.8573	up
pmb0532	C10H13N4O8P	Inosine 5'-monophosphate	Nucleotides and derivatives	Nucleotides and derivatives	131-99-7	1.23125	2.258	1.17505	up		Lmyp005839	C20H20O6	Balanophonin	Lignans and Coumarins	Lignans	118916-57-7	1.20405	0.406652	-1.29813	down
HJKP000649	C8H9NO	N-benzylformamide	Alkaloids	Alkaloids	6343-54-0	1.23929	0.339972	-1.55651	down		Lssp210250	C19H18O10	1,5-dihydroxyxanthone-6-murine O-β-D-glucoside	Others	Saccharides	-	1.12253	0.198718	-2.33121	down
Lahp003986	C21H22O10	3,4-Dihydro-4-(4'-hydroxyphenyl)-5,7-dihydroxycoumarin glucoside	Lignans and Coumarins	Coumarins	-	1.22148	4.24235	2.08486	up		Lmrn001951	C9H10O4	(S)-2-Hydroxy-3-(4-Hydroxyphenyl)Propanoic Acid	Phenolic acids	Phenolic acids	23508-35-2	1.15734	0.442228	-1.17714	down
Lskp211385	C20H20O6	(-)-dihydrosesamin	Lignans and Coumarins	Lignans	-	1.25388	7738.92	12.9179	up		pmn001637	C20H18O10	Kaempferol-3-O-arabinoside (Juglanin)	Flavonoids	Flavonols	5041-67-8	1.25269	0.377715	-1.40463	down
Lssp210250	C19H18O10	1,5-dihydroxyxanthone-6-murine O-β-D-glucoside	Others	Saccharides	-	1.17485	0.143289	-2.803	down		Lmyp004575	C21H24O9	Carambolaside A	Flavonoids	Chalcones	-	1.16765	3.37537	1.75505	up
pmn001637	C20H18O10	Kaempferol-3-O-arabinoside (Juglanin)	Flavonoids	Flavonols	5041-67-8	1.25149	0.343589	-1.54124	down		pmb0618	C28H34O16	Hesperetin-8-C-glucoside-3'-O-glucoside	Flavonoids	Flavonols	-	1.25665	0.138609	-2.85091	down
pmn001378	C26H32O11	Pinoresinol-4-O-glucoside	Lignans and Coumarins	Lignans	41607-20-9	1.2517	2.12687	1.08873	up		pmn001647	C45H38O18	Procyanidin C2	Tannins	Proanthocyanidins	37064-31-6	1.23926	0.496116	-1.01125	down
pmb0618	C28H34O16	Hesperetin-8-C-glucoside-3'-O-glucoside	Flavonoids	Flavonols	-	1.21193	0.125543	-2.99375	down		mws1179	C21H22O10	Naringenin-7-O-glucoside (Prunin)	Flavonoids	Flavanones	529-55-5	1.23096	0.421936	-1.2449	down
pma6455	C5H11O8P	Ribulose-5-phosphate	Others	Saccharides	4300-28-1	1.18645	2.85291	1.51243	up		pma6455	C5H11O8P	Ribulose-5-phosphate	Others	Saccharides	4300-28-1	1.13905	2.2512	1.17069	up
Wagp001741	C19H28N2O9	N-(gamma-L-glutamyl)tyramine O-glucoside	Alkaloids	Phenolamine	-	1.25397	0.338298	-1.56363	down		Wagp001741	C19H28N2O9	N-(gamma-L-glutamyl)tyramine O-glucoside	Alkaloids	Phenolamine	-	1.25505	0.349366	-1.51719	down
mws0675	C11H15N2O8P	β-Nicotinamide mononucleotide	Nucleotides and derivatives	Nucleotides and derivatives	1094-61-7	1.23295	2.47945	1.31002	up		mws0675	C11H15N2O8P	β-Nicotinamide mononucleotide	Nucleotides and derivatives	Nucleotides and derivatives	1094-61-7	1.21797	2.23752	1.1619	up
pmb3023	C21H22O11	Eriodictyol-8-C-glucoside	Flavonoids	Flavanones	1023271-51-3	1.20595	0.454266	-1.13839	down		pmb3023	C21H22O11	Eriodictyol-8-C-glucoside	Flavonoids	Flavanones	1023271-51-3	1.19825	0.419525	-1.25317	down
Lmtn002796	C21H22O11	Aromadendrin-7-O-glucoside	Flavonoids	Flavanonols	28189-90-4	1.20595	0.454266	-1.13839	down		Lmtn002796	C21H22O11	Aromadendrin-7-O-glucoside	Flavonoids	Flavanonols	28189-90-4	1.19825	0.419525	-1.25317	down
pme3083	C8H7NO3	2-(Formylamino)benzoic acid	Phenolic acids	Phenolic acids	3342-77-6	1.24727	3.52408	1.81725	up		pme3083	C8H7NO3	2-(Formylamino)benzoic acid	Phenolic acids	Phenolic acids	3342-77-6	1.24474	3.9244	1.97247	up
mws2218	C8H10N4O2	Caffeine	Alkaloids	Alkaloids	58-08-2	1.25132	2516.04	11.2969	up		Hmcn001884	C21H20O12	6-Hydroxyluteolin 5-glucoside	Flavonoids	Flavones	-	1.23317	0.456287	-1.13199	down
Hmgp003641	C28H32O14	Chrysoeriol-6-C-rhamnoside-7-O-rhamnoside	Flavonoids	Flavones	-	1.24856	0.1445	-2.79086	down		mws2218	C8H10N4O2	Caffeine	Alkaloids	Alkaloids	58-08-2	1.24434	3267.31	11.6739	up
Lmzn001894	C21H18O12	Kaempferol-3-O-glucuronide	Flavonoids	Flavonols	22688-78-4	1.2247	0.481747	-1.05365	down		Lmzn001894	C21H18O12	Kaempferol-3-O-glucuronide	Flavonoids	Flavonols	22688-78-4	1.23643	0.476931	-1.06815	down
HJN087	C21H22O10	Naringenin-4'-O-glucoside	Flavonoids	Flavanones	-	1.25641	4.12645	2.0449	up		Lmhp009526	C27H46O9	2-α-Linolenoyl-glycerol-1-O-glucoside	Lipids	Glycerol ester	-	1.14496	2.49109	1.31678	up
Lmmn002274	C26H34O11	Isolariciresinol-9'-O-glucoside	Lignans and Coumarins	Lignans	63358-12-3	1.23564	0.399806	-1.32263	down		mws1642	C27H34O11	Phillyrin	Lignans and Coumarins	Lignans	487-41-2	1.25309	0.316593	-1.6593	down
Lmmp002904	C26H28O17	Gossypetin-3-O-glucoside-8-O-xyloside	Flavonoids	Flavonols	-	1.22633	0.141426	-2.82188	down		HJN087	C21H22O10	Naringenin-4'-O-glucoside	Flavonoids	Flavanones	-	1.24494	2.17609	1.12174	up
Hmbp002730	C15H10O6	Isoscutellarein	Flavonoids	Flavones	41440-05-5	1.23784	0.27556	-1.85956	down		Lmmn002274	C26H34O11	Isolariciresinol-9'-O-glucoside	Lignans and Coumarins	Lignans	63358-12-3	1.24229	0.493241	-1.01963	down
HJN069	C30H24O12	Tetrahydroxyflavan-(4α-8-epicatechin)	Flavonoids	Flavanols	-	1.09121	3.75562	1.90905	up		Lmmp002904	C26H28O17	Gossypetin-3-O-glucoside-8-O-xyloside	Flavonoids	Flavonols	-	1.24127	0.123739	-3.01463	down
Zmyn000155	C7H14N2O3	N-α-Acetyl-L-ornithine	Amino acids and derivatives	Amino acids and derivatives	6205-08-9	1.23946	4.30784	2.10697	up		Zmyn000155	C7H14N2O3	N-α-Acetyl-L-ornithine	Amino acids and derivatives	Amino acids and derivatives	6205-08-9	1.25013	17.377	4.11911	up
MWSmce339	C10H10O3	2-Methoxycinnamic acid	Phenolic acids	Phenolic acids	6099-03-2	1.25775	0.000748453	-10.3838	down		pmn001368	C32H44O17	Olivil-4,4'-Di-O-glucoside	Lignans and Coumarins	Lignans	-	1.17347	0.377631	-1.40495	down
mws0597	C10H9NO3	5-Hydroxyindole-3-acetic acid	Alkaloids	Plumerane	54-16-0	1.2411	0.499976	-1.00007	down		MWSmce220	C6H10O6	D-Glucono-1,5-lactone	Others	Saccharides	90-80-2	1.20696	0.373002	-1.42275	down
Lmsn004322	C24H24O12	1,6-Di-O-caffeoyl-β-D-glucose	Phenolic acids	Phenolic acids	-	1.19569	0.35751	-1.48395	down		Lmfn003760	C21H18O13	Quercetin-4'-O-glucuronide	Flavonoids	Flavonols	201463-36-7	1.13487	0.35317	-1.50157	down
pmn001368	C32H44O17	Olivil-4,4'-Di-O-glucoside	Lignans and Coumarins	Lignans	-	1.18426	0.441826	-1.17845	down		Lmhp001670	C11H22N2O3	L-Valyl-L-Leucine	Amino acids and derivatives	Amino acids and derivatives	3989-97-7	1.18069	2.45906	1.29811	up
Hmtn001120	C14H20O8	5-(2-Hydroxyethyl)-2-O-glucosylphenol	Phenolic acids	Phenolic acids	-	1.24555	0.454297	-1.13829	down		Lmsn003318	C16H20O9	1-O-Feruloyl-β-D-glucose	Phenolic acids	Phenolic acids	7196-71-6	1.07215	2.39604	1.26065	up
Lmsn010075	C31H48O7	19-Hydroxy-2,3-secours-12-ene-2,3,28-trioic acid 3-methyl ester (Cecropiacic acid 3-methyl ester)	Terpenoids	Triterpene	-	1.22206	3.9391	1.97787	up		Lmyn003028	C19H28O11	Benzyl-β-gentiobioside	Phenolic acids	Phenolic acids	56775-64-5	1.24574	0.113262	-3.14226	down
pmb0665	C27H30O16	Orientin-7-O-glucoside	Flavonoids	Flavones	-	1.11612	0.296443	-1.75417	down		Zmpn000095	C6H15O9P	Sorbitol-6-phosphate	Others	Saccharides	20479-58-7	1.23826	2.48657	1.31416	up
Lhmp122205	C18H20O4	5-O-Methyllatifolin	Others	Others	-	1.25712	2778.12	11.4399	up		MWSmce709	C9H7N	Isoquinoline	Alkaloids	Isoquinoline alkaloids	119-65-3	1.19915	0.264135	-1.92065	down
Lmsn003318	C16H20O9	1-O-Feruloyl-β-D-glucose	Phenolic acids	Phenolic acids	7196-71-6	1.12028	2.82288	1.49717	up		Zmdn001564	C14H18N2O5	γ-Glutamylphenylalanine	Amino acids and derivatives	Amino acids and derivatives	7432-24-8	1.19368	0.138628	-2.85071	down
Lmyn003028	C19H28O11	Benzyl-β-gentiobioside	Phenolic acids	Phenolic acids	56775-64-5	1.25248	0.0652776	-3.93727	down		Lmbp102601	C9H6O3	7-Hydroxycoumarin;Umbelliferone	Lignans and Coumarins	Coumarins	93-35-6	1.25471	2.72844	1.44808	up
Hmln000297	C6H12O6	Inositol	Others	Saccharides	87-89-8	1.23853	2.00113	1.00082	up		MWSHY0136	C21H20O11	Kaempferol-3-O-glucoside (Astragalin)	Flavonoids	Flavonols	480-10-4	1.25384	0.182484	-2.45416	down
Zmpn000095	C6H15O9P	Sorbitol-6-phosphate	Others	Saccharides	20479-58-7	1.21838	2.15901	1.11037	up		MWS5173	C4H5N3O	Isocytosine	Nucleotides and derivatives	Nucleotides and derivatives	108-53-2	1.24329	6.55315	2.71219	up
Lmqn000213	C24H42O21	Stachyose	Others	Saccharides	470-55-3	1.25349	0.00214192	-8.86688	down		mws1360	C21H22O10	Engeletin	Flavonoids	Flavanonols	572-31-6	1.23246	2.8389	1.50533	up
Zmdn001564	C14H18N2O5	γ-Glutamylphenylalanine	Amino acids and derivatives	Amino acids and derivatives	7432-24-8	1.19093	0.206272	-2.27738	down		Lskp211490	C30H46O5	2,3,23-Trihydroxyurs-12,19-dien-28-oic acid	Terpenoids	Triterpene	-	1.24917	0.209473	-2.25516	down
Lmfn004769	C27H22O15	Quercetin-3-O-(4''-O-galloyl)arabinoside	Flavonoids	Flavonols	-	1.24961	0.00154603	-9.33722	down		mws1015	C15H16O9	Esculin (6,7-Dihydroxycoumarin-6-O-glucoside)	Lignans and Coumarins	Coumarins	531-75-9	1.13339	0.183052	-2.44967	down
MWSHY0136	C21H20O11	Kaempferol-3-O-glucoside (Astragalin)	Flavonoids	Flavonols	480-10-4	1.25781	0.1718	-2.5412	down		pmb2591	C13H14N2O3	N-Acetyl-L-Tryptophan	Amino acids and derivatives	Amino acids and derivatives	1218-34-4	1.05603	0.400642	-1.31961	down
Hmcp002187	C23H24O13	Limocitrin-3-O-galactoside	Flavonoids	Flavonols	-	1.03068	2.00408	1.00294	up		Lmmp003271	C21H20O13	Gossypetin-8-O-β-D-glucoside	Flavonoids	Flavonols	652-78-8	1.23753	0.123859	-3.01323	down
mws1360	C21H22O10	Engeletin	Flavonoids	Flavanonols	572-31-6	1.24111	3.42588	1.77648	up		mws1350	C9H10O4	Syringaldehyde; 4-Hydroxy-3,5-Dimethoxybenzaldehyde	Phenolic acids	Phenolic acids	134-96-3	1.05276	2.22201	1.15186	up
Lskp211490	C30H46O5	2,3,23-Trihydroxyurs-12,19-dien-28-oic acid	Terpenoids	Triterpene	-	1.23663	0.221944	-2.17173	down		MWSHY0106	C15H10O8	Myricetin	Flavonoids	Flavonols	529-44-2	1.24367	0.145197	-2.78392	down
mws1015	C15H16O9	Esculin (6,7-Dihydroxycoumarin-6-O-glucoside)	Lignans and Coumarins	Coumarins	531-75-9	1.25526	0.00135613	-9.52628	down		Lskp211257	C30H48O5	2,3,23-Trihydroxyurs-12-en-28-oic acid (Asiatic acid)	Terpenoids	Triterpene	464-92-6	1.20605	0.304362	-1.71614	down
pmb2591	C13H14N2O3	N-Acetyl-L-Tryptophan	Amino acids and derivatives	Amino acids and derivatives	1218-34-4	1.1141	0.327308	-1.61128	down		Lmpp003465	C21H20O13	Myricetin-3-O-β-D-glucoside	Flavonoids	Flavonols	19833-12-6	1.24085	0.137602	-2.86143	down
Lmmp003271	C21H20O13	Gossypetin-8-O-β-D-glucoside	Flavonoids	Flavonols	652-78-8	1.25512	0.0306322	-5.02881	down		Jmwn002172	C14H20O8	3,4-dihydroxyphenylethanol-β-D-glucopyranoside	Phenolic acids	Phenolic acids	-	1.21375	0.362834	-1.46262	down
Lskp211257	C30H48O5	2,3,23-Trihydroxyurs-12-en-28-oic acid (Asiatic acid)	Terpenoids	Triterpene	464-92-6	1.22522	0.282701	-1.82265	down		NK10246260	C9H7NO2	2,4-Dihydroxyquinoline	Alkaloids	Quinoline alkaloids	86-95-3	1.05747	0.482661	-1.05092	down
Lhdp102526	C30H48O4	19-Hydroxyursolic acid	Terpenoids	Triterpene	-	1.02645	0.41261	-1.27715	down		pmb3075	C16H16O7	3-O-p-Coumaroylshikimic acid	Phenolic acids	Phenolic acids	-	1.23478	2.97461	1.5727	up
Lmpp003465	C21H20O13	Myricetin-3-O-β-D-glucoside	Flavonoids	Flavonols	19833-12-6	1.24126	0.0491008	-4.34811	down		Cmsp002787	C11H14O5	3,4'-Dihydroxy-3',5'-dimethoxypropiophenone	Phenolic acids	Phenolic acids	136196-47-9	1.18119	0.497587	-1.00698	down
MWSmce697	C8H10O2	4-Ethoxyphenol	Phenolic acids	Phenolic acids	622-62-8	1.19098	0.410625	-1.28411	down		Hmtn001288	C9H10O4	Methyl 2,4-dihydroxyphenylacetate	Phenolic acids	Phenolic acids	67828-42-6	1.05431	0.421433	-1.24662	down
Jmwn002172	C14H20O8	3,4-dihydroxyphenylethanol-β-D-glucopyranoside	Phenolic acids	Phenolic acids	-	1.20548	0.301071	-1.73183	down		Lmsn009900	C30H46O6	1β-Hydroxy-2-oxopomolic acid	Terpenoids	Triterpene	217466-37-0	1.24199	0.070669	-3.82278	down
pmb3075	C16H16O7	3-O-p-Coumaroylshikimic acid	Phenolic acids	Phenolic acids	-	1.21053	2.19377	1.13341	up		pme0057	C4H9NO2S	L-Homocysteine	Amino acids and derivatives	Amino acids and derivatives	6027-13-0	1.13674	0.271737	-1.87972	down
pme2060	C10H13N5	N6-Isopentenyladenine	Nucleotides and derivatives	Nucleotides and derivatives	2365-40-4	1.01316	2.66181	1.41241	up		pme2598	C8H8O4	3,4-Dihydroxybenzeneacetic acid	Phenolic acids	Phenolic acids	102-32-9	1.25306	0.382261	-1.38737	down
Qmhp090808	C29H28N2O4	18-Demethylparaensidimerin C	Alkaloids	Alkaloids	-	1.24858	0.432995	-1.20758	down		pmb3045	C23H22O13	Tricin-7-O-Glucuronide	Flavonoids	Flavones	-	1.25149	0.00136101	-9.52111	down
Hmtn001288	C9H10O4	Methyl 2,4-dihydroxyphenylacetate	Phenolic acids	Phenolic acids	67828-42-6	1.25868	0.000221936	-12.1376	down		Hmgp003163	C17H14O8	3,3',5,7-Tetrahydroxy-4',6-Dimethoxyflavone; (Laciniatin)	Flavonoids	Flavonols	74161-28-7	1.24389	5.9809	2.58036	up
Lmsn009900	C30H46O6	1β-Hydroxy-2-oxopomolic acid	Terpenoids	Triterpene	217466-37-0	1.24852	0.244525	-2.03195	down		pme2761	C5H6O6	4-Hydroxy-2-oxoglutaric acid	Organic acids	Organic acids	1187-99-1	1.22826	2.25173	1.17103	up
pme0057	C4H9NO2S	L-Homocysteine	Amino acids and derivatives	Amino acids and derivatives	6027-13-0	1.24533	0.205239	-2.28462	down		pme2758	C5H9NO5	4-Hydroxy-L-glutamic acid	Amino acids and derivatives	Amino acids and derivatives	3913-68-6	1.01911	2.76438	1.46695	up
pme2598	C8H8O4	3,4-Dihydroxybenzeneacetic acid	Phenolic acids	Phenolic acids	102-32-9	1.25106	0.472217	-1.08248	down		pme3146	C5H10N2O3	β-Ureidoisobutyric acid	Organic acids	Organic acids	2905-86-4	1.25675	480.038	8.907	up
Lmsn011201	C30H46O5	2,3-Dihydroxy-19-oxo-18,19-secours-11,13(18)-dien-28-oic acid (Swinhoeic acid)	Terpenoids	Triterpene	-	1.24115	0.259282	-1.94741	down		zjmp120215	C30H46O4	3,25-Epoxy-3-hydroxyurs-12-en-28-oic acid (Lantic acid)	Terpenoids	Triterpene	-	1.25744	0.000268494	-11.8628	down
Hmcp002123	C10H8O4	Isoscopoletin (6-Hydroxy-7-Methoxycoumarin)	Lignans and Coumarins	Coumarins	776-86-3	1.25497	1594.3	10.6387	up		Zmjp003179	C26H28O15	Orientin-2''-O-xyloside	Flavonoids	Flavones	-	1.24094	0.0627996	-3.9931	down
mws2523	C12H23O14P	Trehalose 6-phosphate	Others	Saccharides	4484-88-2	1.08922	2.1869	1.12889	up		Lmgn002091	C7H10O5	2-Methyl-3-oxoadipic acid	Organic acids	Organic acids	-	1.24146	2.02874	1.02059	up
Hmgp003163	C17H14O8	3,3',5,7-Tetrahydroxy-4',6-Dimethoxyflavone; (Laciniatin)	Flavonoids	Flavonols	74161-28-7	1.24179	5.36784	2.42434	up		Qmxp091001	C36H56O12	Suavissimoside R1	Terpenoids	Triterpene Saponin	95645-51-5	1.25701	6932.84	12.7592	up
pme2758	C5H9NO5	4-Hydroxy-L-glutamic acid	Amino acids and derivatives	Amino acids and derivatives	3913-68-6	1.25149	0.000646207	-10.5957	down		Wafn002807	C24H24O13	methyl 4-O-galloylchlorogenate	Phenolic acids	Phenolic acids	574747-58-3	1.20137	2.07981	1.05645	up
Lmlp001319	C4H10O2	2,3-Butanediol	Others	Saccharides	513-85-9	1.25917	7720.4	12.9145	up		Xmyp005654	C21H20O11	Kaempferol-4'-O-glucoside	Flavonoids	Flavonols	-	1.23299	0.210777	-2.24621	down
zjmp120215	C30H46O4	3,25-Epoxy-3-hydroxyurs-12-en-28-oic acid (Lantic acid)	Terpenoids	Triterpene	-	1.08699	0.315337	-1.66503	down		Lmsn006130	C36H56O12	2,3,19-Trihydroxyurs-12-en-23,28-dioic acid-28-O-glucoside	Terpenoids	Triterpene Saponin	-	1.25743	7431.73	12.8595	up
Zmjp003179	C26H28O15	Orientin-2''-O-xyloside	Flavonoids	Flavones	-	1.24635	0.10117	-3.30515	down		pmb0709	C30H32O20	Quercetin-7-O-(6''-malonyl)glucosyl-5-O-glucoside	Flavonoids	Flavonols	-	1.2041	0.369996	-1.43442	down
Lmgn002091	C7H10O5	2-Methyl-3-oxoadipic acid	Organic acids	Organic acids	-	1.25571	2.33261	1.22195	up		Zmjp003463	C26H28O14	Vitexin-2''-O-xyloside	Flavonoids	Flavones	-	1.25741	34921.5	15.0918	up
Qmxp091001	C36H56O12	Suavissimoside R1	Terpenoids	Triterpene Saponin	95645-51-5	1.25885	6421.34	12.6487	up		Wafn002874	C22H28O14	4-O-(4'-O-alpha-D-Glucopyranosyl)caffeoylquinic acid	Phenolic acids	Phenolic acids	1401352-62-2	1.2484	0.285732	-1.80727	down
Lmhn003799	C24H22O12	Feruloylferuloyltartaric acid	Phenolic acids	Phenolic acids	-	1.20415	0.465173	-1.10416	down		Lmbp002336	C27H30O16	Quercetin-3-O-(2''-O-rhamnosyl)galactoside	Flavonoids	Flavonols	-	1.25118	0.413442	-1.27424	down
pma0249	C22H22O12	3'-O-Methyltricetin-5-O-glucoside	Flavonoids	Flavones	-	1.24189	0.0920657	-3.44119	down		Smnp001863	C22H24O10	8-O-methyl-7-hydroxyaloin	Quinones	Anthraquinone	-	1.13621	0.0668145	-3.90369	down
mws0874	C10H14N5O7P	3'-Adenylic Acid	Nucleotides and derivatives	Nucleotides and derivatives	84-21-9	1.06779	2.05687	1.04045	up		Hmpp002612	C27H30O16	Luteolin-7-O-gentiobioside	Flavonoids	Flavones	-	1.23367	0.234763	-2.09073	down
Xmyp005654	C21H20O11	Kaempferol-4'-O-glucoside	Flavonoids	Flavonols	-	1.24851	0.175124	-2.51355	down		MWSHY0162	C27H30O17	Quercetin-3-O-sophoroside (Baimaside)	Flavonoids	Flavonols	18609-17-1	1.14548	0.129329	-2.95089	down
Lmsn004674	C15H18O7	1-O-Cinnamoyl-β-D-glucose	Phenolic acids	Phenolic acids	40004-96-4	1.14373	6.35748	2.66846	up		HJN053	C30H24O12	2α,3α-Epoxy-5,7,3',4'-tetrahydroxyflavan-(4β-8-epicatechin)	Tannins	Proanthocyanidins	-	1.25301	3737.38	11.8678	up
pmb0709	C30H32O20	Quercetin-7-O-(6''-malonyl)glucosyl-5-O-glucoside	Flavonoids	Flavonols	-	1.24031	0.371375	-1.42905	down		Lmsn007400	C36H56O11	Rubuside J	Terpenoids	Triterpene Saponin	-	1.11306	0.48943	-1.03083	down
Wafn002874	C22H28O14	4-O-(4'-O-alpha-D-Glucopyranosyl)caffeoylquinic acid	Phenolic acids	Phenolic acids	1401352-62-2	1.25543	0.130317	-2.9399	down		Hmln002355	C27H34O12	5'-Methoxymatairesinoside	Lignans and Coumarins	Lignans	1691201-82-7	1.25696	6.34059e-05	-13.945	down
Smnp001863	C22H24O10	8-O-methyl-7-hydroxyaloin	Quinones	Anthraquinone	-	1.24616	0.103744	-3.2689	down		MWSHY0104	C21H20O11	Luteolin-7-O-glucoside (Cynaroside)	Flavonoids	Flavones	5373-11-5	1.20873	0.24524	-2.02774	down
Hmpp002612	C27H30O16	Luteolin-7-O-gentiobioside	Flavonoids	Flavones	-	1.21786	0.175129	-2.51351	down		Cmdn000784	C5H4N4O3	Uric acid	Nucleotides and derivatives	Nucleotides and derivatives	69-93-2	1.25729	488.895	8.93338	up
MWSHY0162	C27H30O17	Quercetin-3-O-sophoroside (Baimaside)	Flavonoids	Flavonols	18609-17-1	1.07665	0.146841	-2.76768	down		HJAP156	C22H22O12	Laricitrin-3-O-rhamnoside	Flavonoids	Flavonols	-	1.21813	0.290038	-1.78569	down
HJN053	C30H24O12	2α,3α-Epoxy-5,7,3',4'-tetrahydroxyflavan-(4β-8-epicatechin)	Tannins	Proanthocyanidins	-	1.2586	2799.94	11.4512	up		Lmsn002887	C14H16O8	1-O-Caffeoyl-β-D-xylose	Phenolic acids	Phenolic acids	-	1.25269	9.27429e-05	-13.3964	down
Lmsn007400	C36H56O11	Rubuside J	Terpenoids	Triterpene Saponin	-	1.25843	0.000591362	-10.7237	down		Ymjm000142	C17H20O9	5-O-Caffeoylquinic acid methyl ester	Phenolic acids	Phenolic acids	-	1.21978	0.338041	-1.56473	down
MWSHY0104	C21H20O11	Luteolin-7-O-glucoside (Cynaroside)	Flavonoids	Flavones	5373-11-5	1.22976	0.203274	-2.2985	down		Ymjm000141	C17H20O9	4-O-Caffeoylquinic acid methyl ester	Phenolic acids	Phenolic acids	123372-74-7	1.21978	0.338041	-1.56473	down
Cmdn000784	C5H4N4O3	Uric acid	Nucleotides and derivatives	Nucleotides and derivatives	69-93-2	1.25347	1228.54	10.2627	up		pmb2601	C15H16O7	7-Hydroxycoumarin-O-rhamnoside	Lignans and Coumarins	Coumarins	-	1.23965	3.37342	1.75421	up
HJAP156	C22H22O12	Laricitrin-3-O-rhamnoside	Flavonoids	Flavonols	-	1.21733	0.30153	-1.72962	down		pmp001252	C17H17NO3	p-Coumaroyltyramine	Alkaloids	Phenolamine	36417-86-4	1.25608	2904.07	11.5039	up
MWS0502	C3H7NO2	β-Alanine	Amino acids and derivatives	Amino acids and derivatives	107-95-9	1.25906	1.12309e-05	-16.4422	down		Lshp211003	C16H22O9	Sweroside	Terpenoids	Monoterpenoids	14215-86-2	1.20906	0.498408	-1.0046	down
Ymjm000142	C17H20O9	5-O-Caffeoylquinic acid methyl ester	Phenolic acids	Phenolic acids	-	1.14059	0.401939	-1.31495	down		mws1565	C17H24O10	Geniposide	Terpenoids	Monoterpenoids	24512-63-8	1.2367	0.0956769	-3.38568	down
Ymjm000141	C17H20O9	4-O-Caffeoylquinic acid methyl ester	Phenolic acids	Phenolic acids	123372-74-7	1.14059	0.401939	-1.31495	down		pme2776	C10H12N4O4	2'-Deoxyinosine	Nucleotides and derivatives	Nucleotides and derivatives	890-38-0	1.25657	1182.6	10.2077	up
pmb2601	C15H16O7	7-Hydroxycoumarin-O-rhamnoside	Lignans and Coumarins	Coumarins	-	1.23931	2.84241	1.50711	up		Zmxn004201	C36H58O10	Rosamultin	Terpenoids	Triterpene Saponin	88515-58-6	1.18282	0.195771	-2.35276	down
pmp001252	C17H17NO3	p-Coumaroyltyramine	Alkaloids	Phenolamine	36417-86-4	1.25883	4397.39	12.1024	up		Lmjp003822	C26H26O12	3,5-O-Dicaffeoylquinic Acid Methyl Ester	Phenolic acids	Phenolic acids	159934-13-1	1.25682	0.000164116	-12.573	down
Lshp211003	C16H22O9	Sweroside	Terpenoids	Monoterpenoids	14215-86-2	1.14757	0.453515	-1.14078	down		Lmbp002592	C27H30O16	Kaempferol-3,7-O-diglucoside	Flavonoids	Flavonols	25615-14-9	1.25311	0.067761	-3.8834	down
Lmgn003073	C17H20O9	5-O-Feruloylquinic acid	Phenolic acids	Phenolic acids	-	1.10381	3.05492	1.61114	up		Lmpp005842	C22H22O12	6-Methoxyquercetin-3-O-rhamnoside	Flavonoids	Flavonols	-	1.2049	0.184548	-2.43793	down
mws1565	C17H24O10	Geniposide	Terpenoids	Monoterpenoids	24512-63-8	1.21556	0.273459	-1.8706	down		Lmdp002381	C11H14O5	Genipin	Terpenoids	Monoterpenoids	6902-77-8	1.08607	0.394662	-1.34131	down
pme2776	C10H12N4O4	2'-Deoxyinosine	Nucleotides and derivatives	Nucleotides and derivatives	890-38-0	1.25807	1639.61	10.6791	up		Lmtp004126	C24H22O16	Myricetin-3-O-(6''-malony)glucoside	Flavonoids	Flavonols	-	1.19158	0.270453	-1.88655	down
Zmxn004201	C36H58O10	Rosamultin	Terpenoids	Triterpene Saponin	88515-58-6	1.25903	0.000126067	-12.9535	down		Hmgp001996	C15H10O8	Quercetagetin; 3,3',4',5,6,7-Hexahydroxyflavone	Flavonoids	Flavonols	90-18-6	1.07644	0.451386	-1.14757	down
Qaxp004683	C22H30O14	Arillatose B	Phenolic acids	Phenolic acids	137941-45-8	1.14183	0.499621	-1.00109	down		MWSCX015	C9H8O3	Caffeic aldehyde	Phenolic acids	Phenolic acids	141632-15-7	1.13108	2.47681	1.30849	up
Lmbp002592	C27H30O16	Kaempferol-3,7-O-diglucoside	Flavonoids	Flavonols	25615-14-9	1.23901	0.0784606	-3.67189	down		Lmnp002741	C27H30O14	Genkwanin-6-C-(2''-O-apiosyl)glucoside	Flavonoids	Flavones	-	1.18556	0.22826	-2.13125	down
Lmpp005842	C22H22O12	6-Methoxyquercetin-3-O-rhamnoside	Flavonoids	Flavonols	-	1.16666	0.233431	-2.09893	down		pmb0751	C16H16O7	Trans-5-O-(p-Coumaroyl)shikimate	Phenolic acids	Phenolic acids	-	1.24746	7.88242	2.97864	up
Lmdp002381	C11H14O5	Genipin	Terpenoids	Monoterpenoids	6902-77-8	1.15838	0.433075	-1.20731	down		Lmmn004912	C16H12O7	3-O-Methylquercetin	Flavonoids	Flavonols	1486-70-0	1.1009	0.463881	-1.10817	down
Lmtp004126	C24H22O16	Myricetin-3-O-(6''-malony)glucoside	Flavonoids	Flavonols	-	1.1082	0.324196	-1.62506	down		Lmyp004963	C27H30O14	Apigenin-6-C-(2''-rhamnosyl)glucoside	Flavonoids	Flavones	-	1.08948	0.22019	-2.18318	down
MWSCX015	C9H8O3	Caffeic aldehyde	Phenolic acids	Phenolic acids	141632-15-7	1.09394	2.41516	1.27212	up		Zmhp002730	C27H30O17	6-Hydroxykaempferol-6,7-O-Diglucoside	Flavonoids	Flavonols	142674-16-6	1.24463	0.0983098	-3.34652	down
Lmyp004516	C30H26O14	Quercetin-3-O-(2''-O-p-Coumaroyl)galactoside	Flavonoids	Flavonols	-	1.06405	0.293799	-1.7671	down		Lmgn002250	C31H34O17	Dicaffeoylquinic acid-O-glucoside	Phenolic acids	Phenolic acids	-	1.16104	0.436901	-1.19462	down
Lmhn002683	C22H18O11	p-Coumaroylcaffeoyltartaric acid	Phenolic acids	Phenolic acids	-	1.09466	0.421591	-1.24608	down		Hmcp001858	C26H28O14	Kaempferol-3-O-arabinoside-7-O-rhamnoside	Flavonoids	Flavonols	-	1.22034	4.12738	2.04523	up
Lmnp002741	C27H30O14	Genkwanin-6-C-(2''-O-apiosyl)glucoside	Flavonoids	Flavones	-	1.12644	0.291365	-1.7791	down		Qmyp010506	C13H10O4	2,4,6-Trihydroxybenzophenone	Others	Others	3555-86-0	1.18613	0.431093	-1.21393	down
pmb0751	C16H16O7	Trans-5-O-(p-Coumaroyl)shikimate	Phenolic acids	Phenolic acids	-	1.24657	6.07462	2.6028	up		pme0432	C30H24O12	Procyanidin A2	Tannins	Proanthocyanidins	41743-41-3	1.25608	0.000419622	-11.2186	down
Lmjp002461	C27H30O16	Quercetin-3-O-neohesperidoside	Flavonoids	Flavonols	117611-67-3	1.01767	0.371669	-1.42791	down		Zmpn000638	C4H9N3O2	3-Guanidinopropionic acid	Organic acids	Organic acids	353-09-3	1.13008	2.94557	1.55855	up
mws0853	C11H14O4	Sinapyl alcohol	Phenolic acids	Phenolic acids	537-33-7	1.12046	2.27253	1.1843	up		pmb0426	C13H18N2O	N,N-Dimethyl-5-methoxytryptamine	Alkaloids	Plumerane	1019-45-0	1.17415	0.379999	-1.39593	down
Lmmn004912	C16H12O7	3-O-Methylquercetin	Flavonoids	Flavonols	1486-70-0	1.20489	0.432434	-1.20945	down		Lmbp003825	C15H16O8	Skimmin (7-Hydroxycoumarin-7-O-glucoside)	Lignans and Coumarins	Coumarins	93-39-0	1.25705	64247.9	15.9714	up
Lmyp004963	C27H30O14	Apigenin-6-C-(2''-rhamnosyl)glucoside	Flavonoids	Flavones	-	1.25155	0.0658418	-3.92485	down		HJAP154	C23H16O11	Galloylisorhamnetin	Flavonoids	Flavonols	-	1.1719	0.339264	-1.55952	down
pmb0711	C27H30O16	Quercetin-7-O-rutinoside	Flavonoids	Flavonols	147714-62-3	1.24648	0.379207	-1.39894	down		MWSmce159	C10H8O4	6,7-Dihydroxy-4-methylcoumarin	Lignans and Coumarins	Coumarins	529-84-0	1.19804	0.216107	-2.21018	down
Hmjp003546	C30H48O6	2,3,6,23-Tetrahydroxyurs-12-en-28-oic acid (Madecassic acid)	Terpenoids	Triterpene	18449-41-7	1.13748	0.373609	-1.4204	down		pmp000392	C26H30O13	Liquiritigenin-7-O-apioside-4'-O-glucoside	Flavonoids	Flavanones	199796-12-8	1.1906	0.297958	-1.74682	down
HJN051	C28H32O16	Tamarixetin-3-O-rutinoside	Flavonoids	Flavonols	-	1.09174	2.27156	1.18368	up		Sazp004372	C21H22O6	Bursehernin	Lignans and Coumarins	Lignans	-	1.25579	51908	15.6637	up
Cmpp007319	C15H16O4	7-Methoxy-5-Prenyloxycoumarin	Lignans and Coumarins	Coumarins	35590-41-1	1.25899	608.727	9.24965	up		Wafn004433	C17H32O10	1-Hexanol arabinosylglucoside	Others	Others	-	1.00232	2.34864	1.23183	up
Zmhp002730	C27H30O17	6-Hydroxykaempferol-6,7-O-Diglucoside	Flavonoids	Flavonols	142674-16-6	1.25435	0.112234	-3.15542	down		Xmyp005599	C27H30O16	Kaempferol-3-O-galactoside-4'-O-glucoside	Flavonoids	Flavonols	-	1.07051	0.242541	-2.0437	down
MWSHY0067	C27H30O16	Quercetin-3-O-rutinoside (Rutin)	Flavonoids	Flavonols	153-18-4	1.25462	0.430012	-1.21755	down		pmf0400	C22H44O2	Docosanoic acid (Behenic acid)	Lipids	Free fatty acids	112-85-6	1.2425	0.360494	-1.47195	down
Lmgn002250	C31H34O17	Dicaffeoylquinic acid-O-glucoside	Phenolic acids	Phenolic acids	-	1.17743	0.425561	-1.23256	down
Qmyp010506	C13H10O4	2,4,6-Trihydroxybenzophenone	Others	Others	3555-86-0	1.11866	0.293177	-1.77016	down
Lssp210058	C27H30O16	Quercetin-3-O-robinobioside	Flavonoids	Flavonols	52525-35-6	1.12202	0.442025	-1.1778	down
Lmsp004166	C27H30O16	Quercetin-3-O-glucoside-7-O-rhamnoside	Flavonoids	Flavonols	-	1.03726	0.376856	-1.40791	down
Zmpn000638	C4H9N3O2	3-Guanidinopropionic acid	Organic acids	Organic acids	353-09-3	1.15076	3.00604	1.58786	up
pmb0426	C13H18N2O	N,N-Dimethyl-5-methoxytryptamine	Alkaloids	Plumerane	1019-45-0	1.11726	0.462898	-1.11123	down
Lmbp003825	C15H16O8	Skimmin (7-Hydroxycoumarin-7-O-glucoside)	Lignans and Coumarins	Coumarins	93-39-0	1.25775	76111.7	16.2158	up
MWSmce159	C10H8O4	6,7-Dihydroxy-4-methylcoumarin	Lignans and Coumarins	Coumarins	529-84-0	1.16063	0.265286	-1.91438	down
pmp000392	C26H30O13	Liquiritigenin-7-O-apioside-4'-O-glucoside	Flavonoids	Flavanones	199796-12-8	1.03569	0.369507	-1.43633	down
Sazp004372	C21H22O6	Bursehernin	Lignans and Coumarins	Lignans	-	1.25906	30611.4	14.9018	up
Xmyp005599	C27H30O16	Kaempferol-3-O-galactoside-4'-O-glucoside	Flavonoids	Flavonols	-	1.18018	0.221902	-2.17201	down
